# Supplementary material for: Evaluation of the safety and effectiveness of oral propranolol in patients with von Hippel-Lindau disease and retinal hemangioblastomas: phase III clinical trial
Source: PubMed Central journal article supplement — BMJ Open Ophthalmol. 2019 May 28;4(1):e000203. doi: 10.1136/bmjophth-2018-000203 (PMC6557078; doi:10.1136/bmjophth-2018-000203), 2019-05-28
Supplement: bmjophth-2018-000203supp001.pdf [file bmjophth-2018-000203supp001.pdf]

**Supplementary table 1. Recorded variables for each patient.** (Not all trial visits are represented).

| <i>PATIENT 1. Male, 36 yo</i>                  | <i>Baseline Visit</i>                                                                                                                                                                                                                    | <i>1<sup>st</sup> visit</i>                                                                  | <i>2<sup>nd</sup> visit</i>                                      | <i>3<sup>rd</sup> visit</i>                              | <i>Last Clinical Trial Visit</i>                                      |
|------------------------------------------------|------------------------------------------------------------------------------------------------------------------------------------------------------------------------------------------------------------------------------------------|----------------------------------------------------------------------------------------------|------------------------------------------------------------------|----------------------------------------------------------|-----------------------------------------------------------------------|
| <b>UCVA</b><br>Right eye<br>Left eye           | 0,6/0,8<br>1                                                                                                                                                                                                                             | 0,8+1/0,8+1<br>1,25                                                                          | 0,8 +2 /0,8 +2<br>1.25                                           | 0,8 +2 /0,8 +2<br>1.25                                   | 0,7/0,7<br>1                                                          |
| <b>Slit lamp examination</b>                   | Normal                                                                                                                                                                                                                                   | Normal                                                                                       | Normal                                                           | Normal                                                   | Normal                                                                |
| <b>IOP (mmHg)</b><br>Right eye<br>Left eye     | 15<br>15                                                                                                                                                                                                                                 | 12<br>10                                                                                     | 13<br>14                                                         | 12<br>14                                                 | 12<br>10                                                              |
| <b>Funduscopy</b><br>Right eye<br><br>Left eye | <i>1 Peripheral hemangioblastoma in superior temporal retinal area, treated with laser photocoagulation showing great exudation in FA.</i><br><br><i>1 pre-existent peripheral hemangioblastoma treated with laser photocoagulation.</i> | <i>1 Peripheral hemangioblastoma still showing great exudation.</i><br><br><i>No changes</i> | <i>Apparently, increased exudation.</i><br><br><i>No changes</i> | <i>Exudation in resolution.</i><br><br><i>No changes</i> | <i>No exudation at the end of the trial.</i><br><br><i>No changes</i> |
| <b>Retinography/FA</b><br>Right eye            | 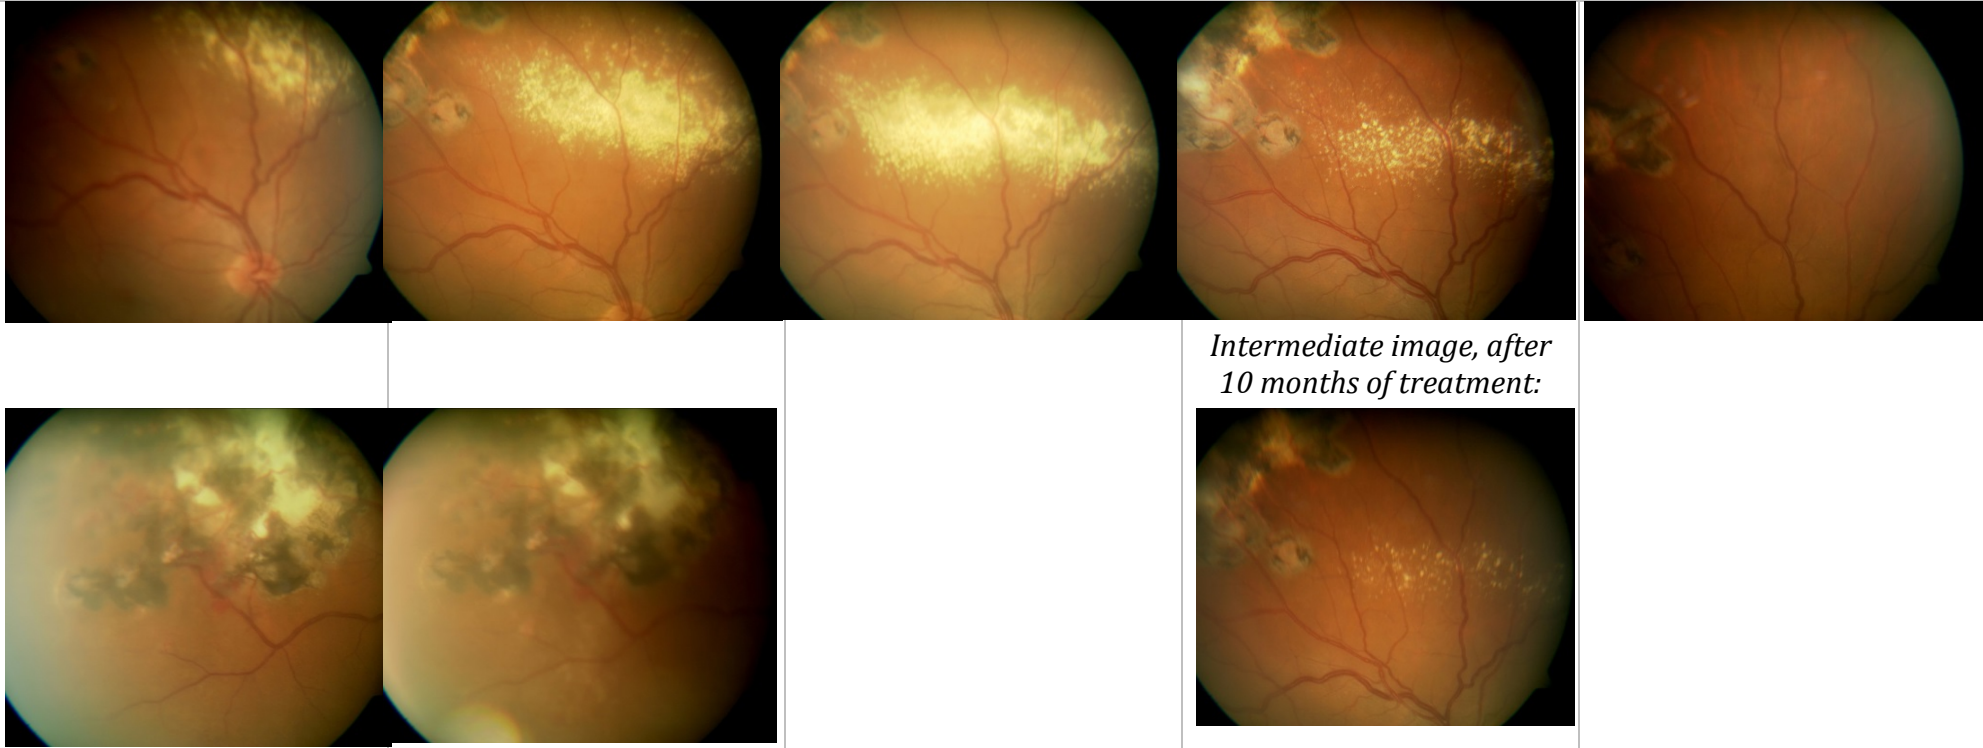                                                                                                                                                     |                                                                                              |                                                                  |                                                          |                                                                       |

|                        |                                                                                     |                   |                   |                   |                   |
|------------------------|-------------------------------------------------------------------------------------|-------------------|-------------------|-------------------|-------------------|
|                        | 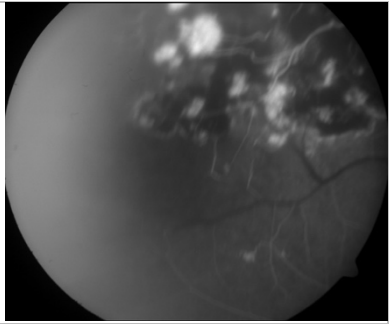   |                   |                   |                   |                   |
| <b>Left eye</b>        |   | <i>No changes</i> | <i>No changes</i> | <i>No changes</i> | <i>No changes</i> |
| <b>OCT<br/>Macular</b> |  | <i>No changes</i> | <i>No changes</i> | <i>No changes</i> | <i>No changes</i> |

| <b>Optic nerve</b>        | 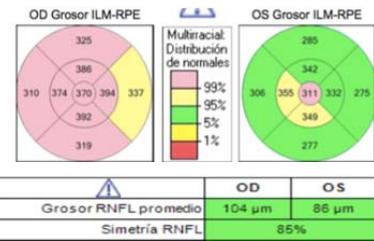 <p>OD Grosor ILM-RPE: 325, 386, 310, 374, 370, 304, 337, 352, 319</p> <p>OS Grosor ILM-RPE: 280, 342, 306, 305, 311, 332, 275, 349, 277</p> <p>Multiracial Distribución de normales: 99%, 95%, 5%, 1%</p> <table border="1"> <thead> <tr> <th></th> <th>OD</th> <th>OS</th> </tr> </thead> <tbody> <tr> <td>Grosor RNFL promedio</td> <td>104 µm</td> <td>86 µm</td> </tr> <tr> <td>Simetría RNFL</td> <td colspan="2">85%</td> </tr> </tbody> </table> |                         | OD                      | OS                      | Grosor RNFL promedio    | 104 µm | 86 µm | Simetría RNFL | 85% |  |  |  |  |  |
|---------------------------|-------------------------------------------------------------------------------------------------------------------------------------------------------------------------------------------------------------------------------------------------------------------------------------------------------------------------------------------------------------------------------------------------------------------------------------------------------------------------------------------------------------------------------------------|-------------------------|-------------------------|-------------------------|-------------------------|--------|-------|---------------|-----|--|--|--|--|--|
|                           | OD                                                                                                                                                                                                                                                                                                                                                                                                                                                                                                                                        | OS                      |                         |                         |                         |        |       |               |     |  |  |  |  |  |
| Grosor RNFL promedio      | 104 µm                                                                                                                                                                                                                                                                                                                                                                                                                                                                                                                                    | 86 µm                   |                         |                         |                         |        |       |               |     |  |  |  |  |  |
| Simetría RNFL             | 85%                                                                                                                                                                                                                                                                                                                                                                                                                                                                                                                                       |                         |                         |                         |                         |        |       |               |     |  |  |  |  |  |
| <b>Propranolol dosage</b> | None                                                                                                                                                                                                                                                                                                                                                                                                                                                                                                                                      | 120 mg/day (40 mg/ 8 h) |        |       |               |     |  |  |  |  |  |
| <b>Comments</b>           | <p><i>This patient had had multiple tumours which required multiple photocoagulations. After 11 months of treatment, he had to suspend it for three months due to a neurosurgery for CNS hemangioblastoma. His regular ophthalmologist wrote in his clinical history "no new lesions/no active lesions" during the following year. He had also the most significant reduction in VEGF levels along the study. At present, <b>he continues taking propranolol off-label.</b></i></p>                                                       |                         |                         |                         |                         |        |       |               |     |  |  |  |  |  |

| LEGEND                             |
|------------------------------------|
| UCVA - Uncorrected visual acuity   |
| IOP - Intraocular pressure         |
| FA - Fluorescein angiography       |
| OCT - Optical coherence tomography |

| <b>PATIENT 2. Female, 33 yo</b>                      | <b>Baseline Visit</b>                                                                                                                                                                                             | <b>1<sup>st</sup> visit</b>      | <b>2<sup>nd</sup> visit</b>  | <b>3<sup>rd</sup> visit</b>  | <b>October 2016 – continued taking propranolol – off-label</b> |
|------------------------------------------------------|-------------------------------------------------------------------------------------------------------------------------------------------------------------------------------------------------------------------|----------------------------------|------------------------------|------------------------------|----------------------------------------------------------------|
| <b>UCVA</b><br>Right eye<br>Left eye                 | 1<br>0,6                                                                                                                                                                                                          | 1<br>0,8+2                       | 1<br>0,8                     | 1<br>0,8                     | 1<br>0,6                                                       |
| <b>Slit lamp examination</b>                         | Normal                                                                                                                                                                                                            | Normal                           | Normal                       | Normal                       | Normal                                                         |
| <b>IOP (mmHg)</b><br>Right eye<br>Left eye           | 16<br>16                                                                                                                                                                                                          | 12<br>10                         | 14<br>14                     | 12<br>10                     | 10<br>10                                                       |
| <b>Funduscopy</b><br>Right eye<br><br>Left eye       | 2 pre-existent hemangioblastomas located one superior and other inferior treated with laser photocoagulation, no exudation<br><br>1 juxtapapillary hemangioblastoma, late hyperfluorescence. Epirretinal membrane | No changes<br><br>Less exudation | No changes<br><br>No changes | No changes<br><br>No changes | No changes<br><br>No changes                                   |
| <b>Retinography /FA</b><br>Right eye<br><br>Left eye | 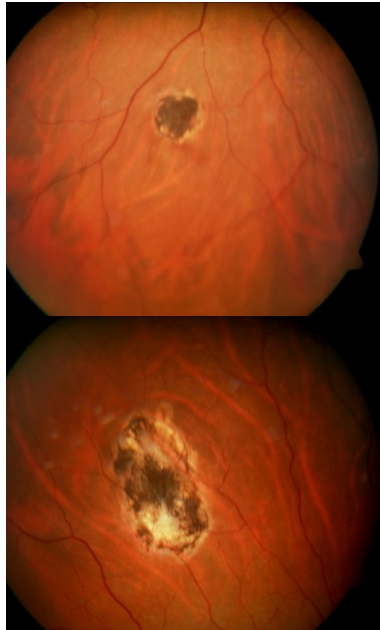                                                                                                                               | No changes                       | No changes                   | No changes                   | No changes                                                     |
|                                                      |                                                                                                                               |                                  |                              |                              |                                                                |



| <i>PATIENT 3. Female, 50 yo</i>                | <i>Baseline Visit</i>                                                                                                                                                          | <i>1<sup>st</sup> visit</i>                                                          | <i>2<sup>nd</sup> visit</i>                                                           | <i>3<sup>rd</sup> visit</i>                                                           | <i>Last Clinical Trial Visit</i>                                                                                                                                                   |
|------------------------------------------------|--------------------------------------------------------------------------------------------------------------------------------------------------------------------------------|--------------------------------------------------------------------------------------|---------------------------------------------------------------------------------------|---------------------------------------------------------------------------------------|------------------------------------------------------------------------------------------------------------------------------------------------------------------------------------|
| <b>UCVA</b><br>Right eye<br>Left eye           | 1,6<br>0,1/0,12                                                                                                                                                                | 1,6<br>0,12                                                                          | 1,2<br>0,1                                                                            | 1<br>0,1/0,2                                                                          | 1<br>0,1/0,2                                                                                                                                                                       |
| <b>Slit lamp examination</b>                   | Normal                                                                                                                                                                         | Normal                                                                               | Normal                                                                                | Normal                                                                                | Normal                                                                                                                                                                             |
| <b>IOP (mmHg)</b><br>Right eye<br>Left eye     | 16<br>18                                                                                                                                                                       | 16<br>16                                                                             | 18<br>18                                                                              | 12<br>12                                                                              | 14<br>18                                                                                                                                                                           |
| <b>Funduscopy</b><br>Right eye<br><br>Left eye | <i>Normal</i><br><br><i>Juxtapapillary hemangioblastoma showing great exudation and macular edema.</i>                                                                         | <i>Normal</i><br><br><i>No changes</i>                                               | <i>Normal</i><br><br><i>Less exudation</i>                                            | <i>Normal</i><br><br><i>Retinal exudation has almost disappeared</i>                  | <i>Normal</i><br><br><i>Exudation still persists</i>                                                                                                                               |
| <b>Retinography/FA</b><br>Right eye            |                                                                                              | <i>No changes</i>                                                                    | <i>No changes</i>                                                                     | <i>No changes</i>                                                                     | <i>No changes</i>                                                                                                                                                                  |
| <b>Left eye</b>                                | <br><br> |  |  |  | <br><br> |

| <b>OCT</b><br><b>Macular</b>                  | 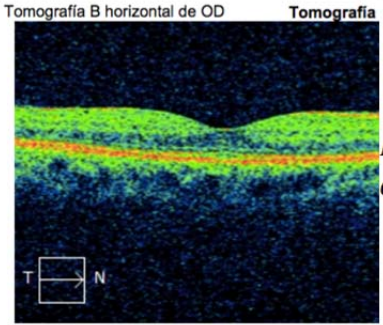                                                                                                                                                                                                                                                                                                                                                                                                                                                                                                                 | <p>Left's eye macular edema decreased 190 <math>\mu\text{m}</math>.</p> | <p>Left's eye macular edema kept decreasing, this time it had decreased 123 <math>\mu\text{m}</math>.</p> | <p>In this visit, left's eye macular edema remained stable. It only decreased 9 <math>\mu\text{m}</math>.</p> | <p>In last visit, macular edema augmented 45 <math>\mu\text{m}</math>.</p> |    |                                               |     |     |  |  |                                   |     |    |  |  |                                     |     |     |  |  |                                                                                                                                                                                                                                                                                                                                                                                                                                                                                                                                                                                                     |           |  |  |    |    |                                               |     |     |  |  |                                   |     |    |  |  |                                     |     |     |  |  |                                                                                                                                                                                                                                                                                                                                                                                                                                                                                                                                                                                                       |           |  |  |    |    |                                               |     |     |  |  |                                   |     |    |  |  |                                     |     |     |  |  |                                                                                                                                                                                                                                                                                                                                                                                                                                                                                                                                                                                                       |           |  |  |    |    |                                               |     |     |  |  |                                   |     |    |  |  |                                     |     |     |  |  |                                                                                                                                                                                                                                                                                                                                                                                                                                                                                                                                                                                                         |           |  |  |    |    |                                               |     |     |  |  |                                   |     |      |  |  |                                     |     |     |  |  |
|-----------------------------------------------|---------------------------------------------------------------------------------------------------------------------------------------------------------------------------------------------------------------------------------------------------------------------------------------------------------------------------------------------------------------------------------------------------------------------------------------------------------------------------------------------------------------------------------------------------------------------------------------------------|-------------------------------------------------------------------------|-----------------------------------------------------------------------------------------------------------|---------------------------------------------------------------------------------------------------------------|----------------------------------------------------------------------------|----|-----------------------------------------------|-----|-----|--|--|-----------------------------------|-----|----|--|--|-------------------------------------|-----|-----|--|--|-----------------------------------------------------------------------------------------------------------------------------------------------------------------------------------------------------------------------------------------------------------------------------------------------------------------------------------------------------------------------------------------------------------------------------------------------------------------------------------------------------------------------------------------------------------------------------------------------------|-----------|--|--|----|----|-----------------------------------------------|-----|-----|--|--|-----------------------------------|-----|----|--|--|-------------------------------------|-----|-----|--|--|-------------------------------------------------------------------------------------------------------------------------------------------------------------------------------------------------------------------------------------------------------------------------------------------------------------------------------------------------------------------------------------------------------------------------------------------------------------------------------------------------------------------------------------------------------------------------------------------------------|-----------|--|--|----|----|-----------------------------------------------|-----|-----|--|--|-----------------------------------|-----|----|--|--|-------------------------------------|-----|-----|--|--|-------------------------------------------------------------------------------------------------------------------------------------------------------------------------------------------------------------------------------------------------------------------------------------------------------------------------------------------------------------------------------------------------------------------------------------------------------------------------------------------------------------------------------------------------------------------------------------------------------|-----------|--|--|----|----|-----------------------------------------------|-----|-----|--|--|-----------------------------------|-----|----|--|--|-------------------------------------|-----|-----|--|--|---------------------------------------------------------------------------------------------------------------------------------------------------------------------------------------------------------------------------------------------------------------------------------------------------------------------------------------------------------------------------------------------------------------------------------------------------------------------------------------------------------------------------------------------------------------------------------------------------------|-----------|--|--|----|----|-----------------------------------------------|-----|-----|--|--|-----------------------------------|-----|------|--|--|-------------------------------------|-----|-----|--|--|
| <b>Optic nerve</b>                            |  <table border="1" data-bbox="557 800 905 905"> <thead> <tr> <th colspan="3">ILM - RPE</th> <th>OD</th> <th>OS</th> </tr> </thead> <tbody> <tr> <td>Grosor del subcampo central (<math>\mu\text{m}</math>)</td> <td>248</td> <td>607</td> <td></td> <td></td> </tr> <tr> <td>Cubo de volumen (<math>\text{mm}^3</math>)</td> <td>9.7</td> <td>15</td> <td></td> <td></td> </tr> <tr> <td>Cubo grosor prom. (<math>\mu\text{m}</math>)</td> <td>270</td> <td>416</td> <td></td> <td></td> </tr> </tbody> </table> | ILM - RPE                                                               |                                                                                                           |                                                                                                               | OD                                                                         | OS | Grosor del subcampo central ( $\mu\text{m}$ ) | 248 | 607 |  |  | Cubo de volumen ( $\text{mm}^3$ ) | 9.7 | 15 |  |  | Cubo grosor prom. ( $\mu\text{m}$ ) | 270 | 416 |  |  |  <table border="1" data-bbox="923 800 1270 905"> <thead> <tr> <th colspan="3">ILM - RPE</th> <th>OD</th> <th>OS</th> </tr> </thead> <tbody> <tr> <td>Grosor del subcampo central (<math>\mu\text{m}</math>)</td> <td>248</td> <td>417</td> <td></td> <td></td> </tr> <tr> <td>Cubo de volumen (<math>\text{mm}^3</math>)</td> <td>9.8</td> <td>15</td> <td></td> <td></td> </tr> <tr> <td>Cubo grosor prom. (<math>\mu\text{m}</math>)</td> <td>272</td> <td>418</td> <td></td> <td></td> </tr> </tbody> </table> | ILM - RPE |  |  | OD | OS | Grosor del subcampo central ( $\mu\text{m}$ ) | 248 | 417 |  |  | Cubo de volumen ( $\text{mm}^3$ ) | 9.8 | 15 |  |  | Cubo grosor prom. ( $\mu\text{m}$ ) | 272 | 418 |  |  |  <table border="1" data-bbox="1291 800 1638 905"> <thead> <tr> <th colspan="3">ILM - RPE</th> <th>OD</th> <th>OS</th> </tr> </thead> <tbody> <tr> <td>Grosor del subcampo central (<math>\mu\text{m}</math>)</td> <td>248</td> <td>294</td> <td></td> <td></td> </tr> <tr> <td>Cubo de volumen (<math>\text{mm}^3</math>)</td> <td>9.9</td> <td>14</td> <td></td> <td></td> </tr> <tr> <td>Cubo grosor prom. (<math>\mu\text{m}</math>)</td> <td>274</td> <td>389</td> <td></td> <td></td> </tr> </tbody> </table> | ILM - RPE |  |  | OD | OS | Grosor del subcampo central ( $\mu\text{m}$ ) | 248 | 294 |  |  | Cubo de volumen ( $\text{mm}^3$ ) | 9.9 | 14 |  |  | Cubo grosor prom. ( $\mu\text{m}$ ) | 274 | 389 |  |  |  <table border="1" data-bbox="1662 800 2009 905"> <thead> <tr> <th colspan="3">ILM - RPE</th> <th>OD</th> <th>OS</th> </tr> </thead> <tbody> <tr> <td>Grosor del subcampo central (<math>\mu\text{m}</math>)</td> <td>255</td> <td>285</td> <td></td> <td></td> </tr> <tr> <td>Cubo de volumen (<math>\text{mm}^3</math>)</td> <td>9.9</td> <td>15</td> <td></td> <td></td> </tr> <tr> <td>Cubo grosor prom. (<math>\mu\text{m}</math>)</td> <td>276</td> <td>418</td> <td></td> <td></td> </tr> </tbody> </table> | ILM - RPE |  |  | OD | OS | Grosor del subcampo central ( $\mu\text{m}$ ) | 255 | 285 |  |  | Cubo de volumen ( $\text{mm}^3$ ) | 9.9 | 15 |  |  | Cubo grosor prom. ( $\mu\text{m}$ ) | 276 | 418 |  |  |  <table border="1" data-bbox="2033 800 2380 905"> <thead> <tr> <th colspan="3">ILM - RPE</th> <th>OD</th> <th>OS</th> </tr> </thead> <tbody> <tr> <td>Grosor del subcampo central (<math>\mu\text{m}</math>)</td> <td>321</td> <td>330</td> <td></td> <td></td> </tr> <tr> <td>Cubo de volumen (<math>\text{mm}^3</math>)</td> <td>9.9</td> <td>11.8</td> <td></td> <td></td> </tr> <tr> <td>Cubo grosor prom. (<math>\mu\text{m}</math>)</td> <td>275</td> <td>328</td> <td></td> <td></td> </tr> </tbody> </table> | ILM - RPE |  |  | OD | OS | Grosor del subcampo central ( $\mu\text{m}$ ) | 321 | 330 |  |  | Cubo de volumen ( $\text{mm}^3$ ) | 9.9 | 11.8 |  |  | Cubo grosor prom. ( $\mu\text{m}$ ) | 275 | 328 |  |  |
| ILM - RPE                                     |                                                                                                                                                                                                                                                                                                                                                                                                                                                                                                                                                                                                   |                                                                         | OD                                                                                                        | OS                                                                                                            |                                                                            |    |                                               |     |     |  |  |                                   |     |    |  |  |                                     |     |     |  |  |                                                                                                                                                                                                                                                                                                                                                                                                                                                                                                                                                                                                     |           |  |  |    |    |                                               |     |     |  |  |                                   |     |    |  |  |                                     |     |     |  |  |                                                                                                                                                                                                                                                                                                                                                                                                                                                                                                                                                                                                       |           |  |  |    |    |                                               |     |     |  |  |                                   |     |    |  |  |                                     |     |     |  |  |                                                                                                                                                                                                                                                                                                                                                                                                                                                                                                                                                                                                       |           |  |  |    |    |                                               |     |     |  |  |                                   |     |    |  |  |                                     |     |     |  |  |                                                                                                                                                                                                                                                                                                                                                                                                                                                                                                                                                                                                         |           |  |  |    |    |                                               |     |     |  |  |                                   |     |      |  |  |                                     |     |     |  |  |
| Grosor del subcampo central ( $\mu\text{m}$ ) | 248                                                                                                                                                                                                                                                                                                                                                                                                                                                                                                                                                                                               | 607                                                                     |                                                                                                           |                                                                                                               |                                                                            |    |                                               |     |     |  |  |                                   |     |    |  |  |                                     |     |     |  |  |                                                                                                                                                                                                                                                                                                                                                                                                                                                                                                                                                                                                     |           |  |  |    |    |                                               |     |     |  |  |                                   |     |    |  |  |                                     |     |     |  |  |                                                                                                                                                                                                                                                                                                                                                                                                                                                                                                                                                                                                       |           |  |  |    |    |                                               |     |     |  |  |                                   |     |    |  |  |                                     |     |     |  |  |                                                                                                                                                                                                                                                                                                                                                                                                                                                                                                                                                                                                       |           |  |  |    |    |                                               |     |     |  |  |                                   |     |    |  |  |                                     |     |     |  |  |                                                                                                                                                                                                                                                                                                                                                                                                                                                                                                                                                                                                         |           |  |  |    |    |                                               |     |     |  |  |                                   |     |      |  |  |                                     |     |     |  |  |
| Cubo de volumen ( $\text{mm}^3$ )             | 9.7                                                                                                                                                                                                                                                                                                                                                                                                                                                                                                                                                                                               | 15                                                                      |                                                                                                           |                                                                                                               |                                                                            |    |                                               |     |     |  |  |                                   |     |    |  |  |                                     |     |     |  |  |                                                                                                                                                                                                                                                                                                                                                                                                                                                                                                                                                                                                     |           |  |  |    |    |                                               |     |     |  |  |                                   |     |    |  |  |                                     |     |     |  |  |                                                                                                                                                                                                                                                                                                                                                                                                                                                                                                                                                                                                       |           |  |  |    |    |                                               |     |     |  |  |                                   |     |    |  |  |                                     |     |     |  |  |                                                                                                                                                                                                                                                                                                                                                                                                                                                                                                                                                                                                       |           |  |  |    |    |                                               |     |     |  |  |                                   |     |    |  |  |                                     |     |     |  |  |                                                                                                                                                                                                                                                                                                                                                                                                                                                                                                                                                                                                         |           |  |  |    |    |                                               |     |     |  |  |                                   |     |      |  |  |                                     |     |     |  |  |
| Cubo grosor prom. ( $\mu\text{m}$ )           | 270                                                                                                                                                                                                                                                                                                                                                                                                                                                                                                                                                                                               | 416                                                                     |                                                                                                           |                                                                                                               |                                                                            |    |                                               |     |     |  |  |                                   |     |    |  |  |                                     |     |     |  |  |                                                                                                                                                                                                                                                                                                                                                                                                                                                                                                                                                                                                     |           |  |  |    |    |                                               |     |     |  |  |                                   |     |    |  |  |                                     |     |     |  |  |                                                                                                                                                                                                                                                                                                                                                                                                                                                                                                                                                                                                       |           |  |  |    |    |                                               |     |     |  |  |                                   |     |    |  |  |                                     |     |     |  |  |                                                                                                                                                                                                                                                                                                                                                                                                                                                                                                                                                                                                       |           |  |  |    |    |                                               |     |     |  |  |                                   |     |    |  |  |                                     |     |     |  |  |                                                                                                                                                                                                                                                                                                                                                                                                                                                                                                                                                                                                         |           |  |  |    |    |                                               |     |     |  |  |                                   |     |      |  |  |                                     |     |     |  |  |
| ILM - RPE                                     |                                                                                                                                                                                                                                                                                                                                                                                                                                                                                                                                                                                                   |                                                                         | OD                                                                                                        | OS                                                                                                            |                                                                            |    |                                               |     |     |  |  |                                   |     |    |  |  |                                     |     |     |  |  |                                                                                                                                                                                                                                                                                                                                                                                                                                                                                                                                                                                                     |           |  |  |    |    |                                               |     |     |  |  |                                   |     |    |  |  |                                     |     |     |  |  |                                                                                                                                                                                                                                                                                                                                                                                                                                                                                                                                                                                                       |           |  |  |    |    |                                               |     |     |  |  |                                   |     |    |  |  |                                     |     |     |  |  |                                                                                                                                                                                                                                                                                                                                                                                                                                                                                                                                                                                                       |           |  |  |    |    |                                               |     |     |  |  |                                   |     |    |  |  |                                     |     |     |  |  |                                                                                                                                                                                                                                                                                                                                                                                                                                                                                                                                                                                                         |           |  |  |    |    |                                               |     |     |  |  |                                   |     |      |  |  |                                     |     |     |  |  |
| Grosor del subcampo central ( $\mu\text{m}$ ) | 248                                                                                                                                                                                                                                                                                                                                                                                                                                                                                                                                                                                               | 417                                                                     |                                                                                                           |                                                                                                               |                                                                            |    |                                               |     |     |  |  |                                   |     |    |  |  |                                     |     |     |  |  |                                                                                                                                                                                                                                                                                                                                                                                                                                                                                                                                                                                                     |           |  |  |    |    |                                               |     |     |  |  |                                   |     |    |  |  |                                     |     |     |  |  |                                                                                                                                                                                                                                                                                                                                                                                                                                                                                                                                                                                                       |           |  |  |    |    |                                               |     |     |  |  |                                   |     |    |  |  |                                     |     |     |  |  |                                                                                                                                                                                                                                                                                                                                                                                                                                                                                                                                                                                                       |           |  |  |    |    |                                               |     |     |  |  |                                   |     |    |  |  |                                     |     |     |  |  |                                                                                                                                                                                                                                                                                                                                                                                                                                                                                                                                                                                                         |           |  |  |    |    |                                               |     |     |  |  |                                   |     |      |  |  |                                     |     |     |  |  |
| Cubo de volumen ( $\text{mm}^3$ )             | 9.8                                                                                                                                                                                                                                                                                                                                                                                                                                                                                                                                                                                               | 15                                                                      |                                                                                                           |                                                                                                               |                                                                            |    |                                               |     |     |  |  |                                   |     |    |  |  |                                     |     |     |  |  |                                                                                                                                                                                                                                                                                                                                                                                                                                                                                                                                                                                                     |           |  |  |    |    |                                               |     |     |  |  |                                   |     |    |  |  |                                     |     |     |  |  |                                                                                                                                                                                                                                                                                                                                                                                                                                                                                                                                                                                                       |           |  |  |    |    |                                               |     |     |  |  |                                   |     |    |  |  |                                     |     |     |  |  |                                                                                                                                                                                                                                                                                                                                                                                                                                                                                                                                                                                                       |           |  |  |    |    |                                               |     |     |  |  |                                   |     |    |  |  |                                     |     |     |  |  |                                                                                                                                                                                                                                                                                                                                                                                                                                                                                                                                                                                                         |           |  |  |    |    |                                               |     |     |  |  |                                   |     |      |  |  |                                     |     |     |  |  |
| Cubo grosor prom. ( $\mu\text{m}$ )           | 272                                                                                                                                                                                                                                                                                                                                                                                                                                                                                                                                                                                               | 418                                                                     |                                                                                                           |                                                                                                               |                                                                            |    |                                               |     |     |  |  |                                   |     |    |  |  |                                     |     |     |  |  |                                                                                                                                                                                                                                                                                                                                                                                                                                                                                                                                                                                                     |           |  |  |    |    |                                               |     |     |  |  |                                   |     |    |  |  |                                     |     |     |  |  |                                                                                                                                                                                                                                                                                                                                                                                                                                                                                                                                                                                                       |           |  |  |    |    |                                               |     |     |  |  |                                   |     |    |  |  |                                     |     |     |  |  |                                                                                                                                                                                                                                                                                                                                                                                                                                                                                                                                                                                                       |           |  |  |    |    |                                               |     |     |  |  |                                   |     |    |  |  |                                     |     |     |  |  |                                                                                                                                                                                                                                                                                                                                                                                                                                                                                                                                                                                                         |           |  |  |    |    |                                               |     |     |  |  |                                   |     |      |  |  |                                     |     |     |  |  |
| ILM - RPE                                     |                                                                                                                                                                                                                                                                                                                                                                                                                                                                                                                                                                                                   |                                                                         | OD                                                                                                        | OS                                                                                                            |                                                                            |    |                                               |     |     |  |  |                                   |     |    |  |  |                                     |     |     |  |  |                                                                                                                                                                                                                                                                                                                                                                                                                                                                                                                                                                                                     |           |  |  |    |    |                                               |     |     |  |  |                                   |     |    |  |  |                                     |     |     |  |  |                                                                                                                                                                                                                                                                                                                                                                                                                                                                                                                                                                                                       |           |  |  |    |    |                                               |     |     |  |  |                                   |     |    |  |  |                                     |     |     |  |  |                                                                                                                                                                                                                                                                                                                                                                                                                                                                                                                                                                                                       |           |  |  |    |    |                                               |     |     |  |  |                                   |     |    |  |  |                                     |     |     |  |  |                                                                                                                                                                                                                                                                                                                                                                                                                                                                                                                                                                                                         |           |  |  |    |    |                                               |     |     |  |  |                                   |     |      |  |  |                                     |     |     |  |  |
| Grosor del subcampo central ( $\mu\text{m}$ ) | 248                                                                                                                                                                                                                                                                                                                                                                                                                                                                                                                                                                                               | 294                                                                     |                                                                                                           |                                                                                                               |                                                                            |    |                                               |     |     |  |  |                                   |     |    |  |  |                                     |     |     |  |  |                                                                                                                                                                                                                                                                                                                                                                                                                                                                                                                                                                                                     |           |  |  |    |    |                                               |     |     |  |  |                                   |     |    |  |  |                                     |     |     |  |  |                                                                                                                                                                                                                                                                                                                                                                                                                                                                                                                                                                                                       |           |  |  |    |    |                                               |     |     |  |  |                                   |     |    |  |  |                                     |     |     |  |  |                                                                                                                                                                                                                                                                                                                                                                                                                                                                                                                                                                                                       |           |  |  |    |    |                                               |     |     |  |  |                                   |     |    |  |  |                                     |     |     |  |  |                                                                                                                                                                                                                                                                                                                                                                                                                                                                                                                                                                                                         |           |  |  |    |    |                                               |     |     |  |  |                                   |     |      |  |  |                                     |     |     |  |  |
| Cubo de volumen ( $\text{mm}^3$ )             | 9.9                                                                                                                                                                                                                                                                                                                                                                                                                                                                                                                                                                                               | 14                                                                      |                                                                                                           |                                                                                                               |                                                                            |    |                                               |     |     |  |  |                                   |     |    |  |  |                                     |     |     |  |  |                                                                                                                                                                                                                                                                                                                                                                                                                                                                                                                                                                                                     |           |  |  |    |    |                                               |     |     |  |  |                                   |     |    |  |  |                                     |     |     |  |  |                                                                                                                                                                                                                                                                                                                                                                                                                                                                                                                                                                                                       |           |  |  |    |    |                                               |     |     |  |  |                                   |     |    |  |  |                                     |     |     |  |  |                                                                                                                                                                                                                                                                                                                                                                                                                                                                                                                                                                                                       |           |  |  |    |    |                                               |     |     |  |  |                                   |     |    |  |  |                                     |     |     |  |  |                                                                                                                                                                                                                                                                                                                                                                                                                                                                                                                                                                                                         |           |  |  |    |    |                                               |     |     |  |  |                                   |     |      |  |  |                                     |     |     |  |  |
| Cubo grosor prom. ( $\mu\text{m}$ )           | 274                                                                                                                                                                                                                                                                                                                                                                                                                                                                                                                                                                                               | 389                                                                     |                                                                                                           |                                                                                                               |                                                                            |    |                                               |     |     |  |  |                                   |     |    |  |  |                                     |     |     |  |  |                                                                                                                                                                                                                                                                                                                                                                                                                                                                                                                                                                                                     |           |  |  |    |    |                                               |     |     |  |  |                                   |     |    |  |  |                                     |     |     |  |  |                                                                                                                                                                                                                                                                                                                                                                                                                                                                                                                                                                                                       |           |  |  |    |    |                                               |     |     |  |  |                                   |     |    |  |  |                                     |     |     |  |  |                                                                                                                                                                                                                                                                                                                                                                                                                                                                                                                                                                                                       |           |  |  |    |    |                                               |     |     |  |  |                                   |     |    |  |  |                                     |     |     |  |  |                                                                                                                                                                                                                                                                                                                                                                                                                                                                                                                                                                                                         |           |  |  |    |    |                                               |     |     |  |  |                                   |     |      |  |  |                                     |     |     |  |  |
| ILM - RPE                                     |                                                                                                                                                                                                                                                                                                                                                                                                                                                                                                                                                                                                   |                                                                         | OD                                                                                                        | OS                                                                                                            |                                                                            |    |                                               |     |     |  |  |                                   |     |    |  |  |                                     |     |     |  |  |                                                                                                                                                                                                                                                                                                                                                                                                                                                                                                                                                                                                     |           |  |  |    |    |                                               |     |     |  |  |                                   |     |    |  |  |                                     |     |     |  |  |                                                                                                                                                                                                                                                                                                                                                                                                                                                                                                                                                                                                       |           |  |  |    |    |                                               |     |     |  |  |                                   |     |    |  |  |                                     |     |     |  |  |                                                                                                                                                                                                                                                                                                                                                                                                                                                                                                                                                                                                       |           |  |  |    |    |                                               |     |     |  |  |                                   |     |    |  |  |                                     |     |     |  |  |                                                                                                                                                                                                                                                                                                                                                                                                                                                                                                                                                                                                         |           |  |  |    |    |                                               |     |     |  |  |                                   |     |      |  |  |                                     |     |     |  |  |
| Grosor del subcampo central ( $\mu\text{m}$ ) | 255                                                                                                                                                                                                                                                                                                                                                                                                                                                                                                                                                                                               | 285                                                                     |                                                                                                           |                                                                                                               |                                                                            |    |                                               |     |     |  |  |                                   |     |    |  |  |                                     |     |     |  |  |                                                                                                                                                                                                                                                                                                                                                                                                                                                                                                                                                                                                     |           |  |  |    |    |                                               |     |     |  |  |                                   |     |    |  |  |                                     |     |     |  |  |                                                                                                                                                                                                                                                                                                                                                                                                                                                                                                                                                                                                       |           |  |  |    |    |                                               |     |     |  |  |                                   |     |    |  |  |                                     |     |     |  |  |                                                                                                                                                                                                                                                                                                                                                                                                                                                                                                                                                                                                       |           |  |  |    |    |                                               |     |     |  |  |                                   |     |    |  |  |                                     |     |     |  |  |                                                                                                                                                                                                                                                                                                                                                                                                                                                                                                                                                                                                         |           |  |  |    |    |                                               |     |     |  |  |                                   |     |      |  |  |                                     |     |     |  |  |
| Cubo de volumen ( $\text{mm}^3$ )             | 9.9                                                                                                                                                                                                                                                                                                                                                                                                                                                                                                                                                                                               | 15                                                                      |                                                                                                           |                                                                                                               |                                                                            |    |                                               |     |     |  |  |                                   |     |    |  |  |                                     |     |     |  |  |                                                                                                                                                                                                                                                                                                                                                                                                                                                                                                                                                                                                     |           |  |  |    |    |                                               |     |     |  |  |                                   |     |    |  |  |                                     |     |     |  |  |                                                                                                                                                                                                                                                                                                                                                                                                                                                                                                                                                                                                       |           |  |  |    |    |                                               |     |     |  |  |                                   |     |    |  |  |                                     |     |     |  |  |                                                                                                                                                                                                                                                                                                                                                                                                                                                                                                                                                                                                       |           |  |  |    |    |                                               |     |     |  |  |                                   |     |    |  |  |                                     |     |     |  |  |                                                                                                                                                                                                                                                                                                                                                                                                                                                                                                                                                                                                         |           |  |  |    |    |                                               |     |     |  |  |                                   |     |      |  |  |                                     |     |     |  |  |
| Cubo grosor prom. ( $\mu\text{m}$ )           | 276                                                                                                                                                                                                                                                                                                                                                                                                                                                                                                                                                                                               | 418                                                                     |                                                                                                           |                                                                                                               |                                                                            |    |                                               |     |     |  |  |                                   |     |    |  |  |                                     |     |     |  |  |                                                                                                                                                                                                                                                                                                                                                                                                                                                                                                                                                                                                     |           |  |  |    |    |                                               |     |     |  |  |                                   |     |    |  |  |                                     |     |     |  |  |                                                                                                                                                                                                                                                                                                                                                                                                                                                                                                                                                                                                       |           |  |  |    |    |                                               |     |     |  |  |                                   |     |    |  |  |                                     |     |     |  |  |                                                                                                                                                                                                                                                                                                                                                                                                                                                                                                                                                                                                       |           |  |  |    |    |                                               |     |     |  |  |                                   |     |    |  |  |                                     |     |     |  |  |                                                                                                                                                                                                                                                                                                                                                                                                                                                                                                                                                                                                         |           |  |  |    |    |                                               |     |     |  |  |                                   |     |      |  |  |                                     |     |     |  |  |
| ILM - RPE                                     |                                                                                                                                                                                                                                                                                                                                                                                                                                                                                                                                                                                                   |                                                                         | OD                                                                                                        | OS                                                                                                            |                                                                            |    |                                               |     |     |  |  |                                   |     |    |  |  |                                     |     |     |  |  |                                                                                                                                                                                                                                                                                                                                                                                                                                                                                                                                                                                                     |           |  |  |    |    |                                               |     |     |  |  |                                   |     |    |  |  |                                     |     |     |  |  |                                                                                                                                                                                                                                                                                                                                                                                                                                                                                                                                                                                                       |           |  |  |    |    |                                               |     |     |  |  |                                   |     |    |  |  |                                     |     |     |  |  |                                                                                                                                                                                                                                                                                                                                                                                                                                                                                                                                                                                                       |           |  |  |    |    |                                               |     |     |  |  |                                   |     |    |  |  |                                     |     |     |  |  |                                                                                                                                                                                                                                                                                                                                                                                                                                                                                                                                                                                                         |           |  |  |    |    |                                               |     |     |  |  |                                   |     |      |  |  |                                     |     |     |  |  |
| Grosor del subcampo central ( $\mu\text{m}$ ) | 321                                                                                                                                                                                                                                                                                                                                                                                                                                                                                                                                                                                               | 330                                                                     |                                                                                                           |                                                                                                               |                                                                            |    |                                               |     |     |  |  |                                   |     |    |  |  |                                     |     |     |  |  |                                                                                                                                                                                                                                                                                                                                                                                                                                                                                                                                                                                                     |           |  |  |    |    |                                               |     |     |  |  |                                   |     |    |  |  |                                     |     |     |  |  |                                                                                                                                                                                                                                                                                                                                                                                                                                                                                                                                                                                                       |           |  |  |    |    |                                               |     |     |  |  |                                   |     |    |  |  |                                     |     |     |  |  |                                                                                                                                                                                                                                                                                                                                                                                                                                                                                                                                                                                                       |           |  |  |    |    |                                               |     |     |  |  |                                   |     |    |  |  |                                     |     |     |  |  |                                                                                                                                                                                                                                                                                                                                                                                                                                                                                                                                                                                                         |           |  |  |    |    |                                               |     |     |  |  |                                   |     |      |  |  |                                     |     |     |  |  |
| Cubo de volumen ( $\text{mm}^3$ )             | 9.9                                                                                                                                                                                                                                                                                                                                                                                                                                                                                                                                                                                               | 11.8                                                                    |                                                                                                           |                                                                                                               |                                                                            |    |                                               |     |     |  |  |                                   |     |    |  |  |                                     |     |     |  |  |                                                                                                                                                                                                                                                                                                                                                                                                                                                                                                                                                                                                     |           |  |  |    |    |                                               |     |     |  |  |                                   |     |    |  |  |                                     |     |     |  |  |                                                                                                                                                                                                                                                                                                                                                                                                                                                                                                                                                                                                       |           |  |  |    |    |                                               |     |     |  |  |                                   |     |    |  |  |                                     |     |     |  |  |                                                                                                                                                                                                                                                                                                                                                                                                                                                                                                                                                                                                       |           |  |  |    |    |                                               |     |     |  |  |                                   |     |    |  |  |                                     |     |     |  |  |                                                                                                                                                                                                                                                                                                                                                                                                                                                                                                                                                                                                         |           |  |  |    |    |                                               |     |     |  |  |                                   |     |      |  |  |                                     |     |     |  |  |
| Cubo grosor prom. ( $\mu\text{m}$ )           | 275                                                                                                                                                                                                                                                                                                                                                                                                                                                                                                                                                                                               | 328                                                                     |                                                                                                           |                                                                                                               |                                                                            |    |                                               |     |     |  |  |                                   |     |    |  |  |                                     |     |     |  |  |                                                                                                                                                                                                                                                                                                                                                                                                                                                                                                                                                                                                     |           |  |  |    |    |                                               |     |     |  |  |                                   |     |    |  |  |                                     |     |     |  |  |                                                                                                                                                                                                                                                                                                                                                                                                                                                                                                                                                                                                       |           |  |  |    |    |                                               |     |     |  |  |                                   |     |    |  |  |                                     |     |     |  |  |                                                                                                                                                                                                                                                                                                                                                                                                                                                                                                                                                                                                       |           |  |  |    |    |                                               |     |     |  |  |                                   |     |    |  |  |                                     |     |     |  |  |                                                                                                                                                                                                                                                                                                                                                                                                                                                                                                                                                                                                         |           |  |  |    |    |                                               |     |     |  |  |                                   |     |      |  |  |                                     |     |     |  |  |
| <b>Propranolol dosage</b>                     | <p>None</p>                                                                                                                                                                                                                                                                                                                                                                                                                                                                                                                                                                                       | <p>120 mg/day (40 mg/ 8 h)</p>                                          | <p>120 mg/day (40 mg/ 8 h)</p>                                                                            | <p>120 mg/day (40 mg/ 8 h)</p>                                                                                | <p>120 mg/day (40 mg/ 8 h)</p>                                             |    |                                               |     |     |  |  |                                   |     |    |  |  |                                     |     |     |  |  |                                                                                                                                                                                                                                                                                                                                                                                                                                                                                                                                                                                                     |           |  |  |    |    |                                               |     |     |  |  |                                   |     |    |  |  |                                     |     |     |  |  |                                                                                                                                                                                                                                                                                                                                                                                                                                                                                                                                                                                                       |           |  |  |    |    |                                               |     |     |  |  |                                   |     |    |  |  |                                     |     |     |  |  |                                                                                                                                                                                                                                                                                                                                                                                                                                                                                                                                                                                                       |           |  |  |    |    |                                               |     |     |  |  |                                   |     |    |  |  |                                     |     |     |  |  |                                                                                                                                                                                                                                                                                                                                                                                                                                                                                                                                                                                                         |           |  |  |    |    |                                               |     |     |  |  |                                   |     |      |  |  |                                     |     |     |  |  |
| <b>Comments</b>                               | <p>This patient and patient 4 are mother and son. They had the same regular ophthalmologist, who had written in their clinical histories that both of them had a severe retinal affection with proliferation, and the tractional component would limit the results.</p>                                                                                                                                                                                                                                                                                                                           |                                                                         |                                                                                                           |                                                                                                               |                                                                            |    |                                               |     |     |  |  |                                   |     |    |  |  |                                     |     |     |  |  |                                                                                                                                                                                                                                                                                                                                                                                                                                                                                                                                                                                                     |           |  |  |    |    |                                               |     |     |  |  |                                   |     |    |  |  |                                     |     |     |  |  |                                                                                                                                                                                                                                                                                                                                                                                                                                                                                                                                                                                                       |           |  |  |    |    |                                               |     |     |  |  |                                   |     |    |  |  |                                     |     |     |  |  |                                                                                                                                                                                                                                                                                                                                                                                                                                                                                                                                                                                                       |           |  |  |    |    |                                               |     |     |  |  |                                   |     |    |  |  |                                     |     |     |  |  |                                                                                                                                                                                                                                                                                                                                                                                                                                                                                                                                                                                                         |           |  |  |    |    |                                               |     |     |  |  |                                   |     |      |  |  |                                     |     |     |  |  |

**LEGEND**

UCVA - Uncorrected visual acuity  
IOP - Intraocular pressure  
FA - Fluorescein angiography  
OCT - Optical coherence tomography

| <b>PATIENT 4. Male, 20 yo</b> | <b>Baseline Visit</b>                                                                      | <b>1<sup>st</sup> visit</b>                                                          | <b>2<sup>nd</sup> visit</b>                                                           | <b>3<sup>rd</sup> visit</b>                                                           | <b>Last Clinical Trial Visit</b>                                                      |
|-------------------------------|--------------------------------------------------------------------------------------------|--------------------------------------------------------------------------------------|---------------------------------------------------------------------------------------|---------------------------------------------------------------------------------------|---------------------------------------------------------------------------------------|
| <b>UCVA</b>                   |                                                                                            |                                                                                      |                                                                                       |                                                                                       |                                                                                       |
| <b>Right eye</b>              | 1,6                                                                                        | 1,6                                                                                  | 1,6                                                                                   | 1,6                                                                                   | 1,6                                                                                   |
| <b>Left eye</b>               | 0,12                                                                                       | 0,12                                                                                 | 0,12                                                                                  | 0,12                                                                                  | 0,1                                                                                   |
| <b>Slit lamp examination</b>  | Normal                                                                                     | Normal                                                                               | Normal                                                                                | Normal                                                                                | Normal                                                                                |
| <b>IOP (mmHg)</b>             |                                                                                            |                                                                                      |                                                                                       |                                                                                       |                                                                                       |
| <b>Right eye</b>              | 16                                                                                         | 16                                                                                   | 15                                                                                    | 16                                                                                    | 14                                                                                    |
| <b>Left eye</b>               | 16                                                                                         | 16                                                                                   | 17                                                                                    | 16                                                                                    | 13                                                                                    |
| <b>Funduscopy</b>             |                                                                                            |                                                                                      |                                                                                       |                                                                                       |                                                                                       |
| <b>Right eye</b>              | <i>Normal</i>                                                                              | <i>Normal</i>                                                                        | <i>Normal</i>                                                                         | <i>Normal</i>                                                                         | <i>Normal</i>                                                                         |
| <b>Left eye</b>               | <i>Juxtapapillary hemangioblastoma and cystoid macular edema. Early hyperfluorescence.</i> | <i>Although lesions persist, exudation has improved.</i>                             | <i>No changes</i>                                                                     | <i>No changes</i>                                                                     | <i>No changes</i>                                                                     |
| <b>Retinography/FA</b>        |                                                                                            |                                                                                      |                                                                                       |                                                                                       |                                                                                       |
| <b>Right eye</b>              |          | <i>No changes</i>                                                                    | <i>No changes</i>                                                                     | <i>No changes</i>                                                                     | <i>No changes</i>                                                                     |
| <b>Left eye</b>               |         |  |  |  |  |
|                               |         |                                                                                      |                                                                                       |                                                                                       |  |



| OCT                              | Macular                                                                                                                                                                                                                                                                                                                                                                                      |                                                                                                                                                                                                                                               |                         |                         |                                  |                      |       |                       |               |      |                        |                                                                                                                                                                                                                                                                                                                           |     |                                                                                                                                                                                                                                                                                                                                                                                          |           |                      |       |                                  |               |     |                       |                                                                                                                                                                                                                                               |      |                        |     |                      |                                                                                                                                                                                                                                                                                                                                                                                            |           |               |     |                                  |                                                                                                                                                                                |     |                       |      |                      |                        |        |     |                                                                                                                                                                                                                                                                                                                                                                                                                                                 |           |    |    |                                  |     |      |                       |      |      |                        |     |     |                                                                                                                                                                                                                                                                                                                                                                                                     |           |    |    |                                  |     |      |                       |      |      |                        |     |     |
|----------------------------------|----------------------------------------------------------------------------------------------------------------------------------------------------------------------------------------------------------------------------------------------------------------------------------------------------------------------------------------------------------------------------------------------|-----------------------------------------------------------------------------------------------------------------------------------------------------------------------------------------------------------------------------------------------|-------------------------|-------------------------|----------------------------------|----------------------|-------|-----------------------|---------------|------|------------------------|---------------------------------------------------------------------------------------------------------------------------------------------------------------------------------------------------------------------------------------------------------------------------------------------------------------------------|-----|------------------------------------------------------------------------------------------------------------------------------------------------------------------------------------------------------------------------------------------------------------------------------------------------------------------------------------------------------------------------------------------|-----------|----------------------|-------|----------------------------------|---------------|-----|-----------------------|-----------------------------------------------------------------------------------------------------------------------------------------------------------------------------------------------------------------------------------------------|------|------------------------|-----|----------------------|--------------------------------------------------------------------------------------------------------------------------------------------------------------------------------------------------------------------------------------------------------------------------------------------------------------------------------------------------------------------------------------------|-----------|---------------|-----|----------------------------------|--------------------------------------------------------------------------------------------------------------------------------------------------------------------------------|-----|-----------------------|------|----------------------|------------------------|--------|-----|-------------------------------------------------------------------------------------------------------------------------------------------------------------------------------------------------------------------------------------------------------------------------------------------------------------------------------------------------------------------------------------------------------------------------------------------------|-----------|----|----|----------------------------------|-----|------|-----------------------|------|------|------------------------|-----|-----|-----------------------------------------------------------------------------------------------------------------------------------------------------------------------------------------------------------------------------------------------------------------------------------------------------------------------------------------------------------------------------------------------------|-----------|----|----|----------------------------------|-----|------|-----------------------|------|------|------------------------|-----|-----|
|                                  | <br><table border="1"> <thead> <tr> <th>ILM - RPE</th> <th>OD</th> <th>OS</th> </tr> </thead> <tbody> <tr> <td>Grosor del subcampo central (µm)</td> <td>268</td> <td>939</td> </tr> <tr> <td>Cubo de volumen (mm³)</td> <td>10,4</td> <td>19,2</td> </tr> <tr> <td>Cubo grosor prom. (µm)</td> <td>288</td> <td>535</td> </tr> </tbody> </table> <p>Great cystic macular edema, 939 µm.</p> | ILM - RPE                                                                                                                                                                                                                                     | OD                      | OS                      | Grosor del subcampo central (µm) | 268                  | 939   | Cubo de volumen (mm³) | 10,4          | 19,2 | Cubo grosor prom. (µm) | 288                                                                                                                                                                                                                                                                                                                       | 535 | <br><table border="1"> <thead> <tr> <th>ILM - RPE</th> <th>OD</th> <th>OS</th> </tr> </thead> <tbody> <tr> <td>Grosor del subcampo central (µm)</td> <td>264</td> <td>774</td> </tr> <tr> <td>Cubo de volumen (mm³)</td> <td>10,3</td> <td>18,7</td> </tr> <tr> <td>Cubo grosor prom. (µm)</td> <td>287</td> <td>518</td> </tr> </tbody> </table> <p>Macular edema decreased 165 µm.</p> | ILM - RPE | OD                   | OS    | Grosor del subcampo central (µm) | 264           | 774 | Cubo de volumen (mm³) | 10,3                                                                                                                                                                                                                                          | 18,7 | Cubo grosor prom. (µm) | 287 | 518                  | <br><table border="1"> <thead> <tr> <th>ILM - RPE</th> <th>OD</th> <th>OS</th> </tr> </thead> <tbody> <tr> <td>Grosor del subcampo central (µm)</td> <td>260</td> <td>697</td> </tr> <tr> <td>Cubo de volumen (mm³)</td> <td>10,4</td> <td>22,1</td> </tr> <tr> <td>Cubo grosor prom. (µm)</td> <td>288</td> <td>614</td> </tr> </tbody> </table> <p>It continued decreasing to 77 µm.</p> | ILM - RPE | OD            | OS  | Grosor del subcampo central (µm) | 260                                                                                                                                                                            | 697 | Cubo de volumen (mm³) | 10,4 | 22,1                 | Cubo grosor prom. (µm) | 288    | 614 | <br><table border="1"> <thead> <tr> <th>ILM - RPE</th> <th>OD</th> <th>OS</th> </tr> </thead> <tbody> <tr> <td>Grosor del subcampo central (µm)</td> <td>262</td> <td>1017</td> </tr> <tr> <td>Cubo de volumen (mm³)</td> <td>10,3</td> <td>18,7</td> </tr> <tr> <td>Cubo grosor prom. (µm)</td> <td>285</td> <td>520</td> </tr> </tbody> </table> <p>Macular edema increased, reaching 1017 µm, and so happened with optic nerve measures.</p> | ILM - RPE | OD | OS | Grosor del subcampo central (µm) | 262 | 1017 | Cubo de volumen (mm³) | 10,3 | 18,7 | Cubo grosor prom. (µm) | 285 | 520 | <br><table border="1"> <thead> <tr> <th>ILM - RPE</th> <th>OD</th> <th>OS</th> </tr> </thead> <tbody> <tr> <td>Grosor del subcampo central (µm)</td> <td>261</td> <td>1101</td> </tr> <tr> <td>Cubo de volumen (mm³)</td> <td>10,4</td> <td>19,6</td> </tr> <tr> <td>Cubo grosor prom. (µm)</td> <td>288</td> <td>546</td> </tr> </tbody> </table> <p>No improvement is seen in the last visit.</p> | ILM - RPE | OD | OS | Grosor del subcampo central (µm) | 261 | 1101 | Cubo de volumen (mm³) | 10,4 | 19,6 | Cubo grosor prom. (µm) | 288 | 546 |
| ILM - RPE                        | OD                                                                                                                                                                                                                                                                                                                                                                                           | OS                                                                                                                                                                                                                                            |                         |                         |                                  |                      |       |                       |               |      |                        |                                                                                                                                                                                                                                                                                                                           |     |                                                                                                                                                                                                                                                                                                                                                                                          |           |                      |       |                                  |               |     |                       |                                                                                                                                                                                                                                               |      |                        |     |                      |                                                                                                                                                                                                                                                                                                                                                                                            |           |               |     |                                  |                                                                                                                                                                                |     |                       |      |                      |                        |        |     |                                                                                                                                                                                                                                                                                                                                                                                                                                                 |           |    |    |                                  |     |      |                       |      |      |                        |     |     |                                                                                                                                                                                                                                                                                                                                                                                                     |           |    |    |                                  |     |      |                       |      |      |                        |     |     |
| Grosor del subcampo central (µm) | 268                                                                                                                                                                                                                                                                                                                                                                                          | 939                                                                                                                                                                                                                                           |                         |                         |                                  |                      |       |                       |               |      |                        |                                                                                                                                                                                                                                                                                                                           |     |                                                                                                                                                                                                                                                                                                                                                                                          |           |                      |       |                                  |               |     |                       |                                                                                                                                                                                                                                               |      |                        |     |                      |                                                                                                                                                                                                                                                                                                                                                                                            |           |               |     |                                  |                                                                                                                                                                                |     |                       |      |                      |                        |        |     |                                                                                                                                                                                                                                                                                                                                                                                                                                                 |           |    |    |                                  |     |      |                       |      |      |                        |     |     |                                                                                                                                                                                                                                                                                                                                                                                                     |           |    |    |                                  |     |      |                       |      |      |                        |     |     |
| Cubo de volumen (mm³)            | 10,4                                                                                                                                                                                                                                                                                                                                                                                         | 19,2                                                                                                                                                                                                                                          |                         |                         |                                  |                      |       |                       |               |      |                        |                                                                                                                                                                                                                                                                                                                           |     |                                                                                                                                                                                                                                                                                                                                                                                          |           |                      |       |                                  |               |     |                       |                                                                                                                                                                                                                                               |      |                        |     |                      |                                                                                                                                                                                                                                                                                                                                                                                            |           |               |     |                                  |                                                                                                                                                                                |     |                       |      |                      |                        |        |     |                                                                                                                                                                                                                                                                                                                                                                                                                                                 |           |    |    |                                  |     |      |                       |      |      |                        |     |     |                                                                                                                                                                                                                                                                                                                                                                                                     |           |    |    |                                  |     |      |                       |      |      |                        |     |     |
| Cubo grosor prom. (µm)           | 288                                                                                                                                                                                                                                                                                                                                                                                          | 535                                                                                                                                                                                                                                           |                         |                         |                                  |                      |       |                       |               |      |                        |                                                                                                                                                                                                                                                                                                                           |     |                                                                                                                                                                                                                                                                                                                                                                                          |           |                      |       |                                  |               |     |                       |                                                                                                                                                                                                                                               |      |                        |     |                      |                                                                                                                                                                                                                                                                                                                                                                                            |           |               |     |                                  |                                                                                                                                                                                |     |                       |      |                      |                        |        |     |                                                                                                                                                                                                                                                                                                                                                                                                                                                 |           |    |    |                                  |     |      |                       |      |      |                        |     |     |                                                                                                                                                                                                                                                                                                                                                                                                     |           |    |    |                                  |     |      |                       |      |      |                        |     |     |
| ILM - RPE                        | OD                                                                                                                                                                                                                                                                                                                                                                                           | OS                                                                                                                                                                                                                                            |                         |                         |                                  |                      |       |                       |               |      |                        |                                                                                                                                                                                                                                                                                                                           |     |                                                                                                                                                                                                                                                                                                                                                                                          |           |                      |       |                                  |               |     |                       |                                                                                                                                                                                                                                               |      |                        |     |                      |                                                                                                                                                                                                                                                                                                                                                                                            |           |               |     |                                  |                                                                                                                                                                                |     |                       |      |                      |                        |        |     |                                                                                                                                                                                                                                                                                                                                                                                                                                                 |           |    |    |                                  |     |      |                       |      |      |                        |     |     |                                                                                                                                                                                                                                                                                                                                                                                                     |           |    |    |                                  |     |      |                       |      |      |                        |     |     |
| Grosor del subcampo central (µm) | 264                                                                                                                                                                                                                                                                                                                                                                                          | 774                                                                                                                                                                                                                                           |                         |                         |                                  |                      |       |                       |               |      |                        |                                                                                                                                                                                                                                                                                                                           |     |                                                                                                                                                                                                                                                                                                                                                                                          |           |                      |       |                                  |               |     |                       |                                                                                                                                                                                                                                               |      |                        |     |                      |                                                                                                                                                                                                                                                                                                                                                                                            |           |               |     |                                  |                                                                                                                                                                                |     |                       |      |                      |                        |        |     |                                                                                                                                                                                                                                                                                                                                                                                                                                                 |           |    |    |                                  |     |      |                       |      |      |                        |     |     |                                                                                                                                                                                                                                                                                                                                                                                                     |           |    |    |                                  |     |      |                       |      |      |                        |     |     |
| Cubo de volumen (mm³)            | 10,3                                                                                                                                                                                                                                                                                                                                                                                         | 18,7                                                                                                                                                                                                                                          |                         |                         |                                  |                      |       |                       |               |      |                        |                                                                                                                                                                                                                                                                                                                           |     |                                                                                                                                                                                                                                                                                                                                                                                          |           |                      |       |                                  |               |     |                       |                                                                                                                                                                                                                                               |      |                        |     |                      |                                                                                                                                                                                                                                                                                                                                                                                            |           |               |     |                                  |                                                                                                                                                                                |     |                       |      |                      |                        |        |     |                                                                                                                                                                                                                                                                                                                                                                                                                                                 |           |    |    |                                  |     |      |                       |      |      |                        |     |     |                                                                                                                                                                                                                                                                                                                                                                                                     |           |    |    |                                  |     |      |                       |      |      |                        |     |     |
| Cubo grosor prom. (µm)           | 287                                                                                                                                                                                                                                                                                                                                                                                          | 518                                                                                                                                                                                                                                           |                         |                         |                                  |                      |       |                       |               |      |                        |                                                                                                                                                                                                                                                                                                                           |     |                                                                                                                                                                                                                                                                                                                                                                                          |           |                      |       |                                  |               |     |                       |                                                                                                                                                                                                                                               |      |                        |     |                      |                                                                                                                                                                                                                                                                                                                                                                                            |           |               |     |                                  |                                                                                                                                                                                |     |                       |      |                      |                        |        |     |                                                                                                                                                                                                                                                                                                                                                                                                                                                 |           |    |    |                                  |     |      |                       |      |      |                        |     |     |                                                                                                                                                                                                                                                                                                                                                                                                     |           |    |    |                                  |     |      |                       |      |      |                        |     |     |
| ILM - RPE                        | OD                                                                                                                                                                                                                                                                                                                                                                                           | OS                                                                                                                                                                                                                                            |                         |                         |                                  |                      |       |                       |               |      |                        |                                                                                                                                                                                                                                                                                                                           |     |                                                                                                                                                                                                                                                                                                                                                                                          |           |                      |       |                                  |               |     |                       |                                                                                                                                                                                                                                               |      |                        |     |                      |                                                                                                                                                                                                                                                                                                                                                                                            |           |               |     |                                  |                                                                                                                                                                                |     |                       |      |                      |                        |        |     |                                                                                                                                                                                                                                                                                                                                                                                                                                                 |           |    |    |                                  |     |      |                       |      |      |                        |     |     |                                                                                                                                                                                                                                                                                                                                                                                                     |           |    |    |                                  |     |      |                       |      |      |                        |     |     |
| Grosor del subcampo central (µm) | 260                                                                                                                                                                                                                                                                                                                                                                                          | 697                                                                                                                                                                                                                                           |                         |                         |                                  |                      |       |                       |               |      |                        |                                                                                                                                                                                                                                                                                                                           |     |                                                                                                                                                                                                                                                                                                                                                                                          |           |                      |       |                                  |               |     |                       |                                                                                                                                                                                                                                               |      |                        |     |                      |                                                                                                                                                                                                                                                                                                                                                                                            |           |               |     |                                  |                                                                                                                                                                                |     |                       |      |                      |                        |        |     |                                                                                                                                                                                                                                                                                                                                                                                                                                                 |           |    |    |                                  |     |      |                       |      |      |                        |     |     |                                                                                                                                                                                                                                                                                                                                                                                                     |           |    |    |                                  |     |      |                       |      |      |                        |     |     |
| Cubo de volumen (mm³)            | 10,4                                                                                                                                                                                                                                                                                                                                                                                         | 22,1                                                                                                                                                                                                                                          |                         |                         |                                  |                      |       |                       |               |      |                        |                                                                                                                                                                                                                                                                                                                           |     |                                                                                                                                                                                                                                                                                                                                                                                          |           |                      |       |                                  |               |     |                       |                                                                                                                                                                                                                                               |      |                        |     |                      |                                                                                                                                                                                                                                                                                                                                                                                            |           |               |     |                                  |                                                                                                                                                                                |     |                       |      |                      |                        |        |     |                                                                                                                                                                                                                                                                                                                                                                                                                                                 |           |    |    |                                  |     |      |                       |      |      |                        |     |     |                                                                                                                                                                                                                                                                                                                                                                                                     |           |    |    |                                  |     |      |                       |      |      |                        |     |     |
| Cubo grosor prom. (µm)           | 288                                                                                                                                                                                                                                                                                                                                                                                          | 614                                                                                                                                                                                                                                           |                         |                         |                                  |                      |       |                       |               |      |                        |                                                                                                                                                                                                                                                                                                                           |     |                                                                                                                                                                                                                                                                                                                                                                                          |           |                      |       |                                  |               |     |                       |                                                                                                                                                                                                                                               |      |                        |     |                      |                                                                                                                                                                                                                                                                                                                                                                                            |           |               |     |                                  |                                                                                                                                                                                |     |                       |      |                      |                        |        |     |                                                                                                                                                                                                                                                                                                                                                                                                                                                 |           |    |    |                                  |     |      |                       |      |      |                        |     |     |                                                                                                                                                                                                                                                                                                                                                                                                     |           |    |    |                                  |     |      |                       |      |      |                        |     |     |
| ILM - RPE                        | OD                                                                                                                                                                                                                                                                                                                                                                                           | OS                                                                                                                                                                                                                                            |                         |                         |                                  |                      |       |                       |               |      |                        |                                                                                                                                                                                                                                                                                                                           |     |                                                                                                                                                                                                                                                                                                                                                                                          |           |                      |       |                                  |               |     |                       |                                                                                                                                                                                                                                               |      |                        |     |                      |                                                                                                                                                                                                                                                                                                                                                                                            |           |               |     |                                  |                                                                                                                                                                                |     |                       |      |                      |                        |        |     |                                                                                                                                                                                                                                                                                                                                                                                                                                                 |           |    |    |                                  |     |      |                       |      |      |                        |     |     |                                                                                                                                                                                                                                                                                                                                                                                                     |           |    |    |                                  |     |      |                       |      |      |                        |     |     |
| Grosor del subcampo central (µm) | 262                                                                                                                                                                                                                                                                                                                                                                                          | 1017                                                                                                                                                                                                                                          |                         |                         |                                  |                      |       |                       |               |      |                        |                                                                                                                                                                                                                                                                                                                           |     |                                                                                                                                                                                                                                                                                                                                                                                          |           |                      |       |                                  |               |     |                       |                                                                                                                                                                                                                                               |      |                        |     |                      |                                                                                                                                                                                                                                                                                                                                                                                            |           |               |     |                                  |                                                                                                                                                                                |     |                       |      |                      |                        |        |     |                                                                                                                                                                                                                                                                                                                                                                                                                                                 |           |    |    |                                  |     |      |                       |      |      |                        |     |     |                                                                                                                                                                                                                                                                                                                                                                                                     |           |    |    |                                  |     |      |                       |      |      |                        |     |     |
| Cubo de volumen (mm³)            | 10,3                                                                                                                                                                                                                                                                                                                                                                                         | 18,7                                                                                                                                                                                                                                          |                         |                         |                                  |                      |       |                       |               |      |                        |                                                                                                                                                                                                                                                                                                                           |     |                                                                                                                                                                                                                                                                                                                                                                                          |           |                      |       |                                  |               |     |                       |                                                                                                                                                                                                                                               |      |                        |     |                      |                                                                                                                                                                                                                                                                                                                                                                                            |           |               |     |                                  |                                                                                                                                                                                |     |                       |      |                      |                        |        |     |                                                                                                                                                                                                                                                                                                                                                                                                                                                 |           |    |    |                                  |     |      |                       |      |      |                        |     |     |                                                                                                                                                                                                                                                                                                                                                                                                     |           |    |    |                                  |     |      |                       |      |      |                        |     |     |
| Cubo grosor prom. (µm)           | 285                                                                                                                                                                                                                                                                                                                                                                                          | 520                                                                                                                                                                                                                                           |                         |                         |                                  |                      |       |                       |               |      |                        |                                                                                                                                                                                                                                                                                                                           |     |                                                                                                                                                                                                                                                                                                                                                                                          |           |                      |       |                                  |               |     |                       |                                                                                                                                                                                                                                               |      |                        |     |                      |                                                                                                                                                                                                                                                                                                                                                                                            |           |               |     |                                  |                                                                                                                                                                                |     |                       |      |                      |                        |        |     |                                                                                                                                                                                                                                                                                                                                                                                                                                                 |           |    |    |                                  |     |      |                       |      |      |                        |     |     |                                                                                                                                                                                                                                                                                                                                                                                                     |           |    |    |                                  |     |      |                       |      |      |                        |     |     |
| ILM - RPE                        | OD                                                                                                                                                                                                                                                                                                                                                                                           | OS                                                                                                                                                                                                                                            |                         |                         |                                  |                      |       |                       |               |      |                        |                                                                                                                                                                                                                                                                                                                           |     |                                                                                                                                                                                                                                                                                                                                                                                          |           |                      |       |                                  |               |     |                       |                                                                                                                                                                                                                                               |      |                        |     |                      |                                                                                                                                                                                                                                                                                                                                                                                            |           |               |     |                                  |                                                                                                                                                                                |     |                       |      |                      |                        |        |     |                                                                                                                                                                                                                                                                                                                                                                                                                                                 |           |    |    |                                  |     |      |                       |      |      |                        |     |     |                                                                                                                                                                                                                                                                                                                                                                                                     |           |    |    |                                  |     |      |                       |      |      |                        |     |     |
| Grosor del subcampo central (µm) | 261                                                                                                                                                                                                                                                                                                                                                                                          | 1101                                                                                                                                                                                                                                          |                         |                         |                                  |                      |       |                       |               |      |                        |                                                                                                                                                                                                                                                                                                                           |     |                                                                                                                                                                                                                                                                                                                                                                                          |           |                      |       |                                  |               |     |                       |                                                                                                                                                                                                                                               |      |                        |     |                      |                                                                                                                                                                                                                                                                                                                                                                                            |           |               |     |                                  |                                                                                                                                                                                |     |                       |      |                      |                        |        |     |                                                                                                                                                                                                                                                                                                                                                                                                                                                 |           |    |    |                                  |     |      |                       |      |      |                        |     |     |                                                                                                                                                                                                                                                                                                                                                                                                     |           |    |    |                                  |     |      |                       |      |      |                        |     |     |
| Cubo de volumen (mm³)            | 10,4                                                                                                                                                                                                                                                                                                                                                                                         | 19,6                                                                                                                                                                                                                                          |                         |                         |                                  |                      |       |                       |               |      |                        |                                                                                                                                                                                                                                                                                                                           |     |                                                                                                                                                                                                                                                                                                                                                                                          |           |                      |       |                                  |               |     |                       |                                                                                                                                                                                                                                               |      |                        |     |                      |                                                                                                                                                                                                                                                                                                                                                                                            |           |               |     |                                  |                                                                                                                                                                                |     |                       |      |                      |                        |        |     |                                                                                                                                                                                                                                                                                                                                                                                                                                                 |           |    |    |                                  |     |      |                       |      |      |                        |     |     |                                                                                                                                                                                                                                                                                                                                                                                                     |           |    |    |                                  |     |      |                       |      |      |                        |     |     |
| Cubo grosor prom. (µm)           | 288                                                                                                                                                                                                                                                                                                                                                                                          | 546                                                                                                                                                                                                                                           |                         |                         |                                  |                      |       |                       |               |      |                        |                                                                                                                                                                                                                                                                                                                           |     |                                                                                                                                                                                                                                                                                                                                                                                          |           |                      |       |                                  |               |     |                       |                                                                                                                                                                                                                                               |      |                        |     |                      |                                                                                                                                                                                                                                                                                                                                                                                            |           |               |     |                                  |                                                                                                                                                                                |     |                       |      |                      |                        |        |     |                                                                                                                                                                                                                                                                                                                                                                                                                                                 |           |    |    |                                  |     |      |                       |      |      |                        |     |     |                                                                                                                                                                                                                                                                                                                                                                                                     |           |    |    |                                  |     |      |                       |      |      |                        |     |     |
|                                  | Optic nerve                                                                                                                                                                                                                                                                                                                                                                                  |                                                                                                                                                                                                                                               |                         |                         |                                  |                      |       |                       |               |      |                        |                                                                                                                                                                                                                                                                                                                           |     |                                                                                                                                                                                                                                                                                                                                                                                          |           |                      |       |                                  |               |     |                       |                                                                                                                                                                                                                                               |      |                        |     |                      |                                                                                                                                                                                                                                                                                                                                                                                            |           |               |     |                                  |                                                                                                                                                                                |     |                       |      |                      |                        |        |     |                                                                                                                                                                                                                                                                                                                                                                                                                                                 |           |    |    |                                  |     |      |                       |      |      |                        |     |     |                                                                                                                                                                                                                                                                                                                                                                                                     |           |    |    |                                  |     |      |                       |      |      |                        |     |     |
|                                  |                                                                                                                                                                                                                                                                                                                                                                                              | <table border="1"> <thead> <tr> <th></th> <th>OD</th> <th>OS</th> </tr> </thead> <tbody> <tr> <td>Grosor RNFL promedio</td> <td>97 µm</td> <td>159 µm</td> </tr> <tr> <td>Simetría RNFL</td> <td colspan="2">41%</td> </tr> </tbody> </table> |                         | OD                      | OS                               | Grosor RNFL promedio | 97 µm | 159 µm                | Simetría RNFL | 41%  |                        | <table border="1"> <thead> <tr> <th></th> <th>OD</th> <th>OS</th> </tr> </thead> <tbody> <tr> <td>Grosor RNFL promedio</td> <td>96 µm</td> <td>106 µm</td> </tr> <tr> <td>Simetría RNFL</td> <td colspan="2">37%</td> </tr> </tbody> </table> <p>Left optic nerve measures also improved, as we can appreciate above.</p> |     | OD                                                                                                                                                                                                                                                                                                                                                                                       | OS        | Grosor RNFL promedio | 96 µm | 106 µm                           | Simetría RNFL | 37% |                       | <table border="1"> <thead> <tr> <th></th> <th>OD</th> <th>OS</th> </tr> </thead> <tbody> <tr> <td>Grosor RNFL promedio</td> <td>98 µm</td> <td>125 µm</td> </tr> <tr> <td>Simetría RNFL</td> <td colspan="2">11%</td> </tr> </tbody> </table> |      | OD                     | OS  | Grosor RNFL promedio | 98 µm                                                                                                                                                                                                                                                                                                                                                                                      | 125 µm    | Simetría RNFL | 11% |                                  | <table border="1"> <thead> <tr> <th></th> <th>OD</th> <th>OS</th> </tr> </thead> <tbody> <tr> <td>Grosor RNFL promedio</td> <td>X</td> <td>113 µm</td> </tr> </tbody> </table> |     | OD                    | OS   | Grosor RNFL promedio | X                      | 113 µm |     |                                                                                                                                                                                                                                                                                                                                                                                                                                                 |           |    |    |                                  |     |      |                       |      |      |                        |     |     |                                                                                                                                                                                                                                                                                                                                                                                                     |           |    |    |                                  |     |      |                       |      |      |                        |     |     |
|                                  | OD                                                                                                                                                                                                                                                                                                                                                                                           | OS                                                                                                                                                                                                                                            |                         |                         |                                  |                      |       |                       |               |      |                        |                                                                                                                                                                                                                                                                                                                           |     |                                                                                                                                                                                                                                                                                                                                                                                          |           |                      |       |                                  |               |     |                       |                                                                                                                                                                                                                                               |      |                        |     |                      |                                                                                                                                                                                                                                                                                                                                                                                            |           |               |     |                                  |                                                                                                                                                                                |     |                       |      |                      |                        |        |     |                                                                                                                                                                                                                                                                                                                                                                                                                                                 |           |    |    |                                  |     |      |                       |      |      |                        |     |     |                                                                                                                                                                                                                                                                                                                                                                                                     |           |    |    |                                  |     |      |                       |      |      |                        |     |     |
| Grosor RNFL promedio             | 97 µm                                                                                                                                                                                                                                                                                                                                                                                        | 159 µm                                                                                                                                                                                                                                        |                         |                         |                                  |                      |       |                       |               |      |                        |                                                                                                                                                                                                                                                                                                                           |     |                                                                                                                                                                                                                                                                                                                                                                                          |           |                      |       |                                  |               |     |                       |                                                                                                                                                                                                                                               |      |                        |     |                      |                                                                                                                                                                                                                                                                                                                                                                                            |           |               |     |                                  |                                                                                                                                                                                |     |                       |      |                      |                        |        |     |                                                                                                                                                                                                                                                                                                                                                                                                                                                 |           |    |    |                                  |     |      |                       |      |      |                        |     |     |                                                                                                                                                                                                                                                                                                                                                                                                     |           |    |    |                                  |     |      |                       |      |      |                        |     |     |
| Simetría RNFL                    | 41%                                                                                                                                                                                                                                                                                                                                                                                          |                                                                                                                                                                                                                                               |                         |                         |                                  |                      |       |                       |               |      |                        |                                                                                                                                                                                                                                                                                                                           |     |                                                                                                                                                                                                                                                                                                                                                                                          |           |                      |       |                                  |               |     |                       |                                                                                                                                                                                                                                               |      |                        |     |                      |                                                                                                                                                                                                                                                                                                                                                                                            |           |               |     |                                  |                                                                                                                                                                                |     |                       |      |                      |                        |        |     |                                                                                                                                                                                                                                                                                                                                                                                                                                                 |           |    |    |                                  |     |      |                       |      |      |                        |     |     |                                                                                                                                                                                                                                                                                                                                                                                                     |           |    |    |                                  |     |      |                       |      |      |                        |     |     |
|                                  | OD                                                                                                                                                                                                                                                                                                                                                                                           | OS                                                                                                                                                                                                                                            |                         |                         |                                  |                      |       |                       |               |      |                        |                                                                                                                                                                                                                                                                                                                           |     |                                                                                                                                                                                                                                                                                                                                                                                          |           |                      |       |                                  |               |     |                       |                                                                                                                                                                                                                                               |      |                        |     |                      |                                                                                                                                                                                                                                                                                                                                                                                            |           |               |     |                                  |                                                                                                                                                                                |     |                       |      |                      |                        |        |     |                                                                                                                                                                                                                                                                                                                                                                                                                                                 |           |    |    |                                  |     |      |                       |      |      |                        |     |     |                                                                                                                                                                                                                                                                                                                                                                                                     |           |    |    |                                  |     |      |                       |      |      |                        |     |     |
| Grosor RNFL promedio             | 96 µm                                                                                                                                                                                                                                                                                                                                                                                        | 106 µm                                                                                                                                                                                                                                        |                         |                         |                                  |                      |       |                       |               |      |                        |                                                                                                                                                                                                                                                                                                                           |     |                                                                                                                                                                                                                                                                                                                                                                                          |           |                      |       |                                  |               |     |                       |                                                                                                                                                                                                                                               |      |                        |     |                      |                                                                                                                                                                                                                                                                                                                                                                                            |           |               |     |                                  |                                                                                                                                                                                |     |                       |      |                      |                        |        |     |                                                                                                                                                                                                                                                                                                                                                                                                                                                 |           |    |    |                                  |     |      |                       |      |      |                        |     |     |                                                                                                                                                                                                                                                                                                                                                                                                     |           |    |    |                                  |     |      |                       |      |      |                        |     |     |
| Simetría RNFL                    | 37%                                                                                                                                                                                                                                                                                                                                                                                          |                                                                                                                                                                                                                                               |                         |                         |                                  |                      |       |                       |               |      |                        |                                                                                                                                                                                                                                                                                                                           |     |                                                                                                                                                                                                                                                                                                                                                                                          |           |                      |       |                                  |               |     |                       |                                                                                                                                                                                                                                               |      |                        |     |                      |                                                                                                                                                                                                                                                                                                                                                                                            |           |               |     |                                  |                                                                                                                                                                                |     |                       |      |                      |                        |        |     |                                                                                                                                                                                                                                                                                                                                                                                                                                                 |           |    |    |                                  |     |      |                       |      |      |                        |     |     |                                                                                                                                                                                                                                                                                                                                                                                                     |           |    |    |                                  |     |      |                       |      |      |                        |     |     |
|                                  | OD                                                                                                                                                                                                                                                                                                                                                                                           | OS                                                                                                                                                                                                                                            |                         |                         |                                  |                      |       |                       |               |      |                        |                                                                                                                                                                                                                                                                                                                           |     |                                                                                                                                                                                                                                                                                                                                                                                          |           |                      |       |                                  |               |     |                       |                                                                                                                                                                                                                                               |      |                        |     |                      |                                                                                                                                                                                                                                                                                                                                                                                            |           |               |     |                                  |                                                                                                                                                                                |     |                       |      |                      |                        |        |     |                                                                                                                                                                                                                                                                                                                                                                                                                                                 |           |    |    |                                  |     |      |                       |      |      |                        |     |     |                                                                                                                                                                                                                                                                                                                                                                                                     |           |    |    |                                  |     |      |                       |      |      |                        |     |     |
| Grosor RNFL promedio             | 98 µm                                                                                                                                                                                                                                                                                                                                                                                        | 125 µm                                                                                                                                                                                                                                        |                         |                         |                                  |                      |       |                       |               |      |                        |                                                                                                                                                                                                                                                                                                                           |     |                                                                                                                                                                                                                                                                                                                                                                                          |           |                      |       |                                  |               |     |                       |                                                                                                                                                                                                                                               |      |                        |     |                      |                                                                                                                                                                                                                                                                                                                                                                                            |           |               |     |                                  |                                                                                                                                                                                |     |                       |      |                      |                        |        |     |                                                                                                                                                                                                                                                                                                                                                                                                                                                 |           |    |    |                                  |     |      |                       |      |      |                        |     |     |                                                                                                                                                                                                                                                                                                                                                                                                     |           |    |    |                                  |     |      |                       |      |      |                        |     |     |
| Simetría RNFL                    | 11%                                                                                                                                                                                                                                                                                                                                                                                          |                                                                                                                                                                                                                                               |                         |                         |                                  |                      |       |                       |               |      |                        |                                                                                                                                                                                                                                                                                                                           |     |                                                                                                                                                                                                                                                                                                                                                                                          |           |                      |       |                                  |               |     |                       |                                                                                                                                                                                                                                               |      |                        |     |                      |                                                                                                                                                                                                                                                                                                                                                                                            |           |               |     |                                  |                                                                                                                                                                                |     |                       |      |                      |                        |        |     |                                                                                                                                                                                                                                                                                                                                                                                                                                                 |           |    |    |                                  |     |      |                       |      |      |                        |     |     |                                                                                                                                                                                                                                                                                                                                                                                                     |           |    |    |                                  |     |      |                       |      |      |                        |     |     |
|                                  | OD                                                                                                                                                                                                                                                                                                                                                                                           | OS                                                                                                                                                                                                                                            |                         |                         |                                  |                      |       |                       |               |      |                        |                                                                                                                                                                                                                                                                                                                           |     |                                                                                                                                                                                                                                                                                                                                                                                          |           |                      |       |                                  |               |     |                       |                                                                                                                                                                                                                                               |      |                        |     |                      |                                                                                                                                                                                                                                                                                                                                                                                            |           |               |     |                                  |                                                                                                                                                                                |     |                       |      |                      |                        |        |     |                                                                                                                                                                                                                                                                                                                                                                                                                                                 |           |    |    |                                  |     |      |                       |      |      |                        |     |     |                                                                                                                                                                                                                                                                                                                                                                                                     |           |    |    |                                  |     |      |                       |      |      |                        |     |     |
| Grosor RNFL promedio             | X                                                                                                                                                                                                                                                                                                                                                                                            | 113 µm                                                                                                                                                                                                                                        |                         |                         |                                  |                      |       |                       |               |      |                        |                                                                                                                                                                                                                                                                                                                           |     |                                                                                                                                                                                                                                                                                                                                                                                          |           |                      |       |                                  |               |     |                       |                                                                                                                                                                                                                                               |      |                        |     |                      |                                                                                                                                                                                                                                                                                                                                                                                            |           |               |     |                                  |                                                                                                                                                                                |     |                       |      |                      |                        |        |     |                                                                                                                                                                                                                                                                                                                                                                                                                                                 |           |    |    |                                  |     |      |                       |      |      |                        |     |     |                                                                                                                                                                                                                                                                                                                                                                                                     |           |    |    |                                  |     |      |                       |      |      |                        |     |     |
| Propranolol dosage               | None                                                                                                                                                                                                                                                                                                                                                                                         | 120 mg/day (40 mg/ 8 h)                                                                                                                                                                                                                       | 120 mg/day (40 mg/ 8 h) | 120 mg/day (40 mg/ 8 h) | 120 mg/day (40 mg/ 8 h)          |                      |       |                       |               |      |                        |                                                                                                                                                                                                                                                                                                                           |     |                                                                                                                                                                                                                                                                                                                                                                                          |           |                      |       |                                  |               |     |                       |                                                                                                                                                                                                                                               |      |                        |     |                      |                                                                                                                                                                                                                                                                                                                                                                                            |           |               |     |                                  |                                                                                                                                                                                |     |                       |      |                      |                        |        |     |                                                                                                                                                                                                                                                                                                                                                                                                                                                 |           |    |    |                                  |     |      |                       |      |      |                        |     |     |                                                                                                                                                                                                                                                                                                                                                                                                     |           |    |    |                                  |     |      |                       |      |      |                        |     |     |
| Comments                         | This patient and patient 3 are son and mother. They had the same regular ophthalmologist, who had written in their clinical histories that both of them had a severe retinal affectionation with proliferation, and the tractional component would limit the results.                                                                                                                        |                                                                                                                                                                                                                                               |                         |                         |                                  |                      |       |                       |               |      |                        |                                                                                                                                                                                                                                                                                                                           |     |                                                                                                                                                                                                                                                                                                                                                                                          |           |                      |       |                                  |               |     |                       |                                                                                                                                                                                                                                               |      |                        |     |                      |                                                                                                                                                                                                                                                                                                                                                                                            |           |               |     |                                  |                                                                                                                                                                                |     |                       |      |                      |                        |        |     |                                                                                                                                                                                                                                                                                                                                                                                                                                                 |           |    |    |                                  |     |      |                       |      |      |                        |     |     |                                                                                                                                                                                                                                                                                                                                                                                                     |           |    |    |                                  |     |      |                       |      |      |                        |     |     |

**LEGEND**

UCVA - Uncorrected visual acuity  
IOP – Intraocular pressure  
FA – Fluorescein angiography  
OCT - Optical coherence tomography

| <b>PATIENT 5. Male, 15 yo</b>              | <b>Baseline Visit</b>                                                                                                         | <b>1<sup>st</sup> visit</b>                                                         | <b>2<sup>nd</sup> visit</b>                                                          | <b>Last Clinical Trial Visit</b>                                                                                    | <b>February 2017 - having discontinued propranolol</b>                               |
|--------------------------------------------|-------------------------------------------------------------------------------------------------------------------------------|-------------------------------------------------------------------------------------|--------------------------------------------------------------------------------------|---------------------------------------------------------------------------------------------------------------------|--------------------------------------------------------------------------------------|
| <b>UCVA</b><br>Right eye<br>Left eye       | 1<br>1,2                                                                                                                      | 1,25<br>1,25                                                                        | 1,25<br>1,25                                                                         | 1<br>1,25                                                                                                           | 1<br>1                                                                               |
| <b>Slit lamp examination</b>               | Normal                                                                                                                        | Normal                                                                              | Normal                                                                               | Normal                                                                                                              | Normal                                                                               |
| <b>IOP (mmHg)</b><br>Right eye<br>Left eye | 18<br>18                                                                                                                      | 15<br>13                                                                            | 15<br>13                                                                             | 11<br>9                                                                                                             | 14<br>13                                                                             |
| <b>Funduscopy</b><br>Right eye             | <i>1 peripheral hemangioblastoma located inferior temporal, treated with laser photocoagulation, showing dilated vessels.</i> | <i>No changes</i>                                                                   | <i>The tumour seemed a little bit more retracted, although it had the same size.</i> | <i>No changes</i>                                                                                                   | <b><i>The tumour appeared larger and congested.</i></b>                              |
| <b>Left eye</b>                            | <i>Normal</i>                                                                                                                 | <i>Normal</i>                                                                       | <i>Normal</i>                                                                        | <i>Normal</i>                                                                                                       | <i>Normal</i>                                                                        |
| <b>Retinography/FA</b><br>Right eye        | 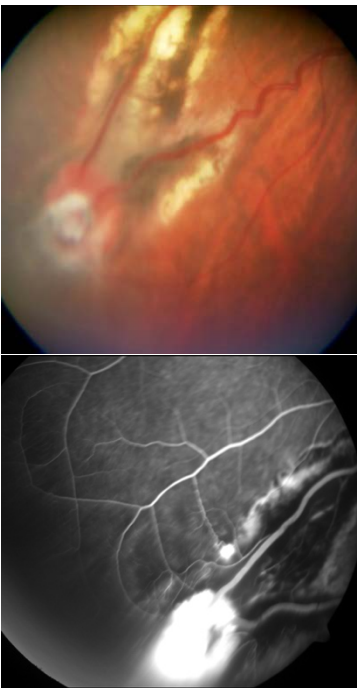 <p>Early hyperfluorescence</p>             |  |  |  <p>Early hyperfluorescence</p> |  |

| Left eye                           |                                                                                                                                                                                                                                                                                                                                                                                       | No changes              | No changes              | No changes              | No changes                       |        |       |                                    |      |      |                        |            |            |            |            |            |            |
|------------------------------------|------------------------------------------------------------------------------------------------------------------------------------------------------------------------------------------------------------------------------------------------------------------------------------------------------------------------------------------------------------------------------------------------------------------------------------------------------------------------|-------------------------|-------------------------|-------------------------|----------------------------------|--------|-------|------------------------------------|------|------|------------------------|------------|------------|------------|------------|------------|------------|
| OCT<br>Macular                     | <table border="1" data-bbox="557 527 893 625"> <thead> <tr> <th>ILM - RPE</th> <th>OD</th> <th>OS</th> </tr> </thead> <tbody> <tr> <td>Grosor del subcampo central (µm)</td> <td>301</td> <td>278</td> </tr> <tr> <td>Cubo de volumen (mm<sup>3</sup>)</td> <td>10,8</td> <td>10,3</td> </tr> <tr> <td>Cubo grosor prom. (µm)</td> <td>301</td> <td>286</td> </tr> </tbody> </table>  | ILM - RPE               | OD                      | OS                      | Grosor del subcampo central (µm) | 301    | 278   | Cubo de volumen (mm <sup>3</sup> ) | 10,8 | 10,3 | Cubo grosor prom. (µm) | 301        | 286        | No changes | No changes | No changes | No changes |
| ILM - RPE                          | OD                                                                                                                                                                                                                                                                                                                                                                                                                                                                     | OS                      |                         |                         |                                  |        |       |                                    |      |      |                        |            |            |            |            |            |            |
| Grosor del subcampo central (µm)   | 301                                                                                                                                                                                                                                                                                                                                                                                                                                                                    | 278                     |                         |                         |                                  |        |       |                                    |      |      |                        |            |            |            |            |            |            |
| Cubo de volumen (mm <sup>3</sup> ) | 10,8                                                                                                                                                                                                                                                                                                                                                                                                                                                                   | 10,3                    |                         |                         |                                  |        |       |                                    |      |      |                        |            |            |            |            |            |            |
| Cubo grosor prom. (µm)             | 301                                                                                                                                                                                                                                                                                                                                                                                                                                                                    | 286                     |                         |                         |                                  |        |       |                                    |      |      |                        |            |            |            |            |            |            |
| Optic nerve                        |  <table border="1" data-bbox="557 951 893 1024"> <thead> <tr> <th></th> <th>OD</th> <th>OS</th> </tr> </thead> <tbody> <tr> <td>Grosor RNFL promedio</td> <td>115 µm</td> <td>96 µm</td> </tr> <tr> <td>Simetría RNFL</td> <td colspan="2">86%</td> </tr> </tbody> </table>                                                                                                           |                         | OD                      | OS                      | Grosor RNFL promedio             | 115 µm | 96 µm | Simetría RNFL                      | 86%  |      | No changes             | No changes | No changes | No changes |            |            |            |
|                                    | OD                                                                                                                                                                                                                                                                                                                                                                                                                                                                     | OS                      |                         |                         |                                  |        |       |                                    |      |      |                        |            |            |            |            |            |            |
| Grosor RNFL promedio               | 115 µm                                                                                                                                                                                                                                                                                                                                                                                                                                                                 | 96 µm                   |                         |                         |                                  |        |       |                                    |      |      |                        |            |            |            |            |            |            |
| Simetría RNFL                      | 86%                                                                                                                                                                                                                                                                                                                                                                                                                                                                    |                         |                         |                         |                                  |        |       |                                    |      |      |                        |            |            |            |            |            |            |
| Propranolol dosage                 | None                                                                                                                                                                                                                                                                                                                                                                                                                                                                   | 120 mg/day (40 mg/ 8 h)          |        |       |                                    |      |      |                        |            |            |            |            |            |            |
| Comments                           | After the end of the clinical trial, <b>this patient continued taking propranolol off label for 6 months</b> . Three months after suspension of treatment, he experienced an increase in tumor activity and had to undergo a serial of different treatments to try to control it.                                                                                                                                                                                      |                         |                         |                         |                                  |        |       |                                    |      |      |                        |            |            |            |            |            |            |

**LEGEND**

UCVA - Uncorrected visual acuity  
IOP - Intraocular pressure  
FA - Fluorescein angiography  
OCT - Optical coherence tomography

| <i>PATIENT 6. Female, 38 yo</i>            | <i>Baseline Visit</i>                                                                                  | <i>1<sup>st</sup> visit</i> | <i>2<sup>nd</sup> visit</i>                                                           | <i>3<sup>rd</sup> visit</i>                                                                                                                                     | <i>Withdrawn from the clinical trial due to a scheduled surgery</i> |
|--------------------------------------------|--------------------------------------------------------------------------------------------------------|-----------------------------|---------------------------------------------------------------------------------------|-----------------------------------------------------------------------------------------------------------------------------------------------------------------|---------------------------------------------------------------------|
| <b>UCVA</b><br>Right eye<br>Left eye       | 1,6<br>0,1/0,12                                                                                        | 1<br>0,16                   | 1<br>0,125                                                                            | 1<br>0,125                                                                                                                                                      | -                                                                   |
| <b>Slit lamp examination</b>               | Normal                                                                                                 | Normal                      | Normal                                                                                | Normal                                                                                                                                                          | -                                                                   |
| <b>IOP (mmHg)</b><br>Right eye<br>Left eye | 12<br>16                                                                                               | 16<br>16                    | 16<br>17                                                                              | 12<br>13                                                                                                                                                        | -                                                                   |
| <b>Funduscopy</b><br>Right eye<br>Left eye | <i>Normal</i>                                                                                          | <i>Normal</i>               | <i>Normal</i>                                                                         | <i>No changes</i>                                                                                                                                               | -<br>-<br>-                                                         |
|                                            | <i>Juxtapapillary hemangioblastoma surrounded by scar tissue from photodynamic therapy. Exudation.</i> | <i>No changes</i>           | <i>No changes</i>                                                                     | <i>Juxtapapillary hemangioblastoma surrounded by scar tissue from photodynamic therapy. Exudation. Epiretinal membrane and vitreomacular traction syndrome.</i> |                                                                     |
| <b>Retinography/FA</b><br>Right eye        | 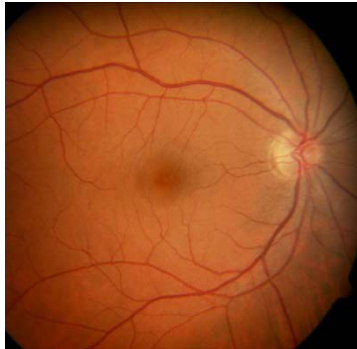                     | <i>No changes</i>           | <i>No changes</i>                                                                     | <i>No changes</i>                                                                                                                                               |                                                                     |
| <b>Left eye</b>                            |                    |                             |  |                                                                                                                                                                 | <b>Withdrawn</b>                                                    |

|                                  | 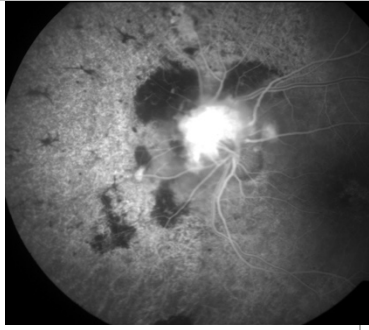                                                                                                                                                                                                                                                                                                                                                                                    |                                |                                |                                | <b>Withdrawn</b>                 |       |        |                       |     |     |                                                                                                                                                                                                                                                                                                                                     |     |     |                                                                                                                                                                                                                                                                                                                                                                                                                                 |                      |       |        |                                  |     |     |                                                                                                                                                                                                                                                                                                                                     |     |     |                        |                      |       |                                                                                                                                                                                                                                                                                                                                                                                                                                                                                                                                                                  |               |     |    |                                  |     |     |                       |     |      |                        |     |     |  |
|----------------------------------|----------------------------------------------------------------------------------------------------------------------------------------------------------------------------------------------------------------------------------------------------------------------------------------------------------------------------------------------------------------------------------------------------------------------------------------------------------------------|--------------------------------|--------------------------------|--------------------------------|----------------------------------|-------|--------|-----------------------|-----|-----|-------------------------------------------------------------------------------------------------------------------------------------------------------------------------------------------------------------------------------------------------------------------------------------------------------------------------------------|-----|-----|---------------------------------------------------------------------------------------------------------------------------------------------------------------------------------------------------------------------------------------------------------------------------------------------------------------------------------------------------------------------------------------------------------------------------------|----------------------|-------|--------|----------------------------------|-----|-----|-------------------------------------------------------------------------------------------------------------------------------------------------------------------------------------------------------------------------------------------------------------------------------------------------------------------------------------|-----|-----|------------------------|----------------------|-------|------------------------------------------------------------------------------------------------------------------------------------------------------------------------------------------------------------------------------------------------------------------------------------------------------------------------------------------------------------------------------------------------------------------------------------------------------------------------------------------------------------------------------------------------------------------|---------------|-----|----|----------------------------------|-----|-----|-----------------------|-----|------|------------------------|-----|-----|--|
|                                  | Early hyperfluorescence                                                                                                                                                                                                                                                                                                                                                                                                                                              |                                |                                |                                |                                  |       |        |                       |     |     |                                                                                                                                                                                                                                                                                                                                     |     |     |                                                                                                                                                                                                                                                                                                                                                                                                                                 |                      |       |        |                                  |     |     |                                                                                                                                                                                                                                                                                                                                     |     |     |                        |                      |       |                                                                                                                                                                                                                                                                                                                                                                                                                                                                                                                                                                  |               |     |    |                                  |     |     |                       |     |      |                        |     |     |  |
| <b>OCT</b><br><i>Macular</i>     |  <table border="1"> <thead> <tr> <th>ILM - RPE</th> <th>OD</th> <th>OS</th> </tr> </thead> <tbody> <tr> <td>Grosor del subcampo central (µm)</td> <td>260</td> <td>188</td> </tr> <tr> <td>Cubo de volumen (mm³)</td> <td>9.5</td> <td>9.1</td> </tr> <tr> <td>Cubo grosor prom. (µm)</td> <td>264</td> <td>253</td> </tr> </tbody> </table> <p><i>Macular atrophy left eye</i></p> | ILM - RPE                      | OD                             | OS                             | Grosor del subcampo central (µm) | 260   | 188    | Cubo de volumen (mm³) | 9.5 | 9.1 | Cubo grosor prom. (µm)                                                                                                                                                                                                                                                                                                              | 264 | 253 |  <table border="1"> <thead> <tr> <th>ILM - RPE</th> <th>OD</th> <th>OS</th> </tr> </thead> <tbody> <tr> <td>Grosor del subcampo central (µm)</td> <td>260</td> <td>224</td> </tr> <tr> <td>Cubo de volumen (mm³)</td> <td>9.5</td> <td>9.8</td> </tr> <tr> <td>Cubo grosor prom. (µm)</td> <td>263</td> <td>272</td> </tr> </tbody> </table> | ILM - RPE            | OD    | OS     | Grosor del subcampo central (µm) | 260 | 224 | Cubo de volumen (mm³)                                                                                                                                                                                                                                                                                                               | 9.5 | 9.8 | Cubo grosor prom. (µm) | 263                  | 272   |  <table border="1"> <thead> <tr> <th>ILM - RPE</th> <th>OD</th> <th>OS</th> </tr> </thead> <tbody> <tr> <td>Grosor del subcampo central (µm)</td> <td>264</td> <td>668</td> </tr> <tr> <td>Cubo de volumen (mm³)</td> <td>9.6</td> <td>16.4</td> </tr> <tr> <td>Cubo grosor prom. (µm)</td> <td>266</td> <td>455</td> </tr> </tbody> </table> <p><i>Epiretinal membrane left eye</i></p>  | ILM - RPE     | OD  | OS | Grosor del subcampo central (µm) | 264 | 668 | Cubo de volumen (mm³) | 9.6 | 16.4 | Cubo grosor prom. (µm) | 266 | 455 |  |
| ILM - RPE                        | OD                                                                                                                                                                                                                                                                                                                                                                                                                                                                   | OS                             |                                |                                |                                  |       |        |                       |     |     |                                                                                                                                                                                                                                                                                                                                     |     |     |                                                                                                                                                                                                                                                                                                                                                                                                                                 |                      |       |        |                                  |     |     |                                                                                                                                                                                                                                                                                                                                     |     |     |                        |                      |       |                                                                                                                                                                                                                                                                                                                                                                                                                                                                                                                                                                  |               |     |    |                                  |     |     |                       |     |      |                        |     |     |  |
| Grosor del subcampo central (µm) | 260                                                                                                                                                                                                                                                                                                                                                                                                                                                                  | 188                            |                                |                                |                                  |       |        |                       |     |     |                                                                                                                                                                                                                                                                                                                                     |     |     |                                                                                                                                                                                                                                                                                                                                                                                                                                 |                      |       |        |                                  |     |     |                                                                                                                                                                                                                                                                                                                                     |     |     |                        |                      |       |                                                                                                                                                                                                                                                                                                                                                                                                                                                                                                                                                                  |               |     |    |                                  |     |     |                       |     |      |                        |     |     |  |
| Cubo de volumen (mm³)            | 9.5                                                                                                                                                                                                                                                                                                                                                                                                                                                                  | 9.1                            |                                |                                |                                  |       |        |                       |     |     |                                                                                                                                                                                                                                                                                                                                     |     |     |                                                                                                                                                                                                                                                                                                                                                                                                                                 |                      |       |        |                                  |     |     |                                                                                                                                                                                                                                                                                                                                     |     |     |                        |                      |       |                                                                                                                                                                                                                                                                                                                                                                                                                                                                                                                                                                  |               |     |    |                                  |     |     |                       |     |      |                        |     |     |  |
| Cubo grosor prom. (µm)           | 264                                                                                                                                                                                                                                                                                                                                                                                                                                                                  | 253                            |                                |                                |                                  |       |        |                       |     |     |                                                                                                                                                                                                                                                                                                                                     |     |     |                                                                                                                                                                                                                                                                                                                                                                                                                                 |                      |       |        |                                  |     |     |                                                                                                                                                                                                                                                                                                                                     |     |     |                        |                      |       |                                                                                                                                                                                                                                                                                                                                                                                                                                                                                                                                                                  |               |     |    |                                  |     |     |                       |     |      |                        |     |     |  |
| ILM - RPE                        | OD                                                                                                                                                                                                                                                                                                                                                                                                                                                                   | OS                             |                                |                                |                                  |       |        |                       |     |     |                                                                                                                                                                                                                                                                                                                                     |     |     |                                                                                                                                                                                                                                                                                                                                                                                                                                 |                      |       |        |                                  |     |     |                                                                                                                                                                                                                                                                                                                                     |     |     |                        |                      |       |                                                                                                                                                                                                                                                                                                                                                                                                                                                                                                                                                                  |               |     |    |                                  |     |     |                       |     |      |                        |     |     |  |
| Grosor del subcampo central (µm) | 260                                                                                                                                                                                                                                                                                                                                                                                                                                                                  | 224                            |                                |                                |                                  |       |        |                       |     |     |                                                                                                                                                                                                                                                                                                                                     |     |     |                                                                                                                                                                                                                                                                                                                                                                                                                                 |                      |       |        |                                  |     |     |                                                                                                                                                                                                                                                                                                                                     |     |     |                        |                      |       |                                                                                                                                                                                                                                                                                                                                                                                                                                                                                                                                                                  |               |     |    |                                  |     |     |                       |     |      |                        |     |     |  |
| Cubo de volumen (mm³)            | 9.5                                                                                                                                                                                                                                                                                                                                                                                                                                                                  | 9.8                            |                                |                                |                                  |       |        |                       |     |     |                                                                                                                                                                                                                                                                                                                                     |     |     |                                                                                                                                                                                                                                                                                                                                                                                                                                 |                      |       |        |                                  |     |     |                                                                                                                                                                                                                                                                                                                                     |     |     |                        |                      |       |                                                                                                                                                                                                                                                                                                                                                                                                                                                                                                                                                                  |               |     |    |                                  |     |     |                       |     |      |                        |     |     |  |
| Cubo grosor prom. (µm)           | 263                                                                                                                                                                                                                                                                                                                                                                                                                                                                  | 272                            |                                |                                |                                  |       |        |                       |     |     |                                                                                                                                                                                                                                                                                                                                     |     |     |                                                                                                                                                                                                                                                                                                                                                                                                                                 |                      |       |        |                                  |     |     |                                                                                                                                                                                                                                                                                                                                     |     |     |                        |                      |       |                                                                                                                                                                                                                                                                                                                                                                                                                                                                                                                                                                  |               |     |    |                                  |     |     |                       |     |      |                        |     |     |  |
| ILM - RPE                        | OD                                                                                                                                                                                                                                                                                                                                                                                                                                                                   | OS                             |                                |                                |                                  |       |        |                       |     |     |                                                                                                                                                                                                                                                                                                                                     |     |     |                                                                                                                                                                                                                                                                                                                                                                                                                                 |                      |       |        |                                  |     |     |                                                                                                                                                                                                                                                                                                                                     |     |     |                        |                      |       |                                                                                                                                                                                                                                                                                                                                                                                                                                                                                                                                                                  |               |     |    |                                  |     |     |                       |     |      |                        |     |     |  |
| Grosor del subcampo central (µm) | 264                                                                                                                                                                                                                                                                                                                                                                                                                                                                  | 668                            |                                |                                |                                  |       |        |                       |     |     |                                                                                                                                                                                                                                                                                                                                     |     |     |                                                                                                                                                                                                                                                                                                                                                                                                                                 |                      |       |        |                                  |     |     |                                                                                                                                                                                                                                                                                                                                     |     |     |                        |                      |       |                                                                                                                                                                                                                                                                                                                                                                                                                                                                                                                                                                  |               |     |    |                                  |     |     |                       |     |      |                        |     |     |  |
| Cubo de volumen (mm³)            | 9.6                                                                                                                                                                                                                                                                                                                                                                                                                                                                  | 16.4                           |                                |                                |                                  |       |        |                       |     |     |                                                                                                                                                                                                                                                                                                                                     |     |     |                                                                                                                                                                                                                                                                                                                                                                                                                                 |                      |       |        |                                  |     |     |                                                                                                                                                                                                                                                                                                                                     |     |     |                        |                      |       |                                                                                                                                                                                                                                                                                                                                                                                                                                                                                                                                                                  |               |     |    |                                  |     |     |                       |     |      |                        |     |     |  |
| Cubo grosor prom. (µm)           | 266                                                                                                                                                                                                                                                                                                                                                                                                                                                                  | 455                            |                                |                                |                                  |       |        |                       |     |     |                                                                                                                                                                                                                                                                                                                                     |     |     |                                                                                                                                                                                                                                                                                                                                                                                                                                 |                      |       |        |                                  |     |     |                                                                                                                                                                                                                                                                                                                                     |     |     |                        |                      |       |                                                                                                                                                                                                                                                                                                                                                                                                                                                                                                                                                                  |               |     |    |                                  |     |     |                       |     |      |                        |     |     |  |
| <i>Optic nerve</i>               |  <p><i>No changes</i></p> <table border="1"> <thead> <tr> <th></th> <th>OD</th> <th>OS</th> </tr> </thead> <tbody> <tr> <td>Grosor RNFL promedio</td> <td>86 µm</td> <td>175 µm</td> </tr> <tr> <td>Simetría RNFL</td> <td colspan="2">53%</td> </tr> </tbody> </table>                                                                                                           |                                | OD                             | OS                             | Grosor RNFL promedio             | 86 µm | 175 µm | Simetría RNFL         | 53% |     |  <table border="1"> <thead> <tr> <th></th> <th>OD</th> <th>OS</th> </tr> </thead> <tbody> <tr> <td>Grosor RNFL promedio</td> <td>88 µm</td> <td>158 µm</td> </tr> <tr> <td>Simetría RNFL</td> <td colspan="2">28%</td> </tr> </tbody> </table> |     | OD  | OS                                                                                                                                                                                                                                                                                                                                                                                                                              | Grosor RNFL promedio | 88 µm | 158 µm | Simetría RNFL                    | 28% |     |  <table border="1"> <thead> <tr> <th></th> <th>OD</th> <th>OS</th> </tr> </thead> <tbody> <tr> <td>Grosor RNFL promedio</td> <td>87 µm</td> <td>198 µm</td> </tr> <tr> <td>Simetría RNFL</td> <td colspan="2">29%</td> </tr> </tbody> </table> |     | OD  | OS                     | Grosor RNFL promedio | 87 µm | 198 µm                                                                                                                                                                                                                                                                                                                                                                                                                                                                                                                                                           | Simetría RNFL | 29% |    | -                                |     |     |                       |     |      |                        |     |     |  |
|                                  | OD                                                                                                                                                                                                                                                                                                                                                                                                                                                                   | OS                             |                                |                                |                                  |       |        |                       |     |     |                                                                                                                                                                                                                                                                                                                                     |     |     |                                                                                                                                                                                                                                                                                                                                                                                                                                 |                      |       |        |                                  |     |     |                                                                                                                                                                                                                                                                                                                                     |     |     |                        |                      |       |                                                                                                                                                                                                                                                                                                                                                                                                                                                                                                                                                                  |               |     |    |                                  |     |     |                       |     |      |                        |     |     |  |
| Grosor RNFL promedio             | 86 µm                                                                                                                                                                                                                                                                                                                                                                                                                                                                | 175 µm                         |                                |                                |                                  |       |        |                       |     |     |                                                                                                                                                                                                                                                                                                                                     |     |     |                                                                                                                                                                                                                                                                                                                                                                                                                                 |                      |       |        |                                  |     |     |                                                                                                                                                                                                                                                                                                                                     |     |     |                        |                      |       |                                                                                                                                                                                                                                                                                                                                                                                                                                                                                                                                                                  |               |     |    |                                  |     |     |                       |     |      |                        |     |     |  |
| Simetría RNFL                    | 53%                                                                                                                                                                                                                                                                                                                                                                                                                                                                  |                                |                                |                                |                                  |       |        |                       |     |     |                                                                                                                                                                                                                                                                                                                                     |     |     |                                                                                                                                                                                                                                                                                                                                                                                                                                 |                      |       |        |                                  |     |     |                                                                                                                                                                                                                                                                                                                                     |     |     |                        |                      |       |                                                                                                                                                                                                                                                                                                                                                                                                                                                                                                                                                                  |               |     |    |                                  |     |     |                       |     |      |                        |     |     |  |
|                                  | OD                                                                                                                                                                                                                                                                                                                                                                                                                                                                   | OS                             |                                |                                |                                  |       |        |                       |     |     |                                                                                                                                                                                                                                                                                                                                     |     |     |                                                                                                                                                                                                                                                                                                                                                                                                                                 |                      |       |        |                                  |     |     |                                                                                                                                                                                                                                                                                                                                     |     |     |                        |                      |       |                                                                                                                                                                                                                                                                                                                                                                                                                                                                                                                                                                  |               |     |    |                                  |     |     |                       |     |      |                        |     |     |  |
| Grosor RNFL promedio             | 88 µm                                                                                                                                                                                                                                                                                                                                                                                                                                                                | 158 µm                         |                                |                                |                                  |       |        |                       |     |     |                                                                                                                                                                                                                                                                                                                                     |     |     |                                                                                                                                                                                                                                                                                                                                                                                                                                 |                      |       |        |                                  |     |     |                                                                                                                                                                                                                                                                                                                                     |     |     |                        |                      |       |                                                                                                                                                                                                                                                                                                                                                                                                                                                                                                                                                                  |               |     |    |                                  |     |     |                       |     |      |                        |     |     |  |
| Simetría RNFL                    | 28%                                                                                                                                                                                                                                                                                                                                                                                                                                                                  |                                |                                |                                |                                  |       |        |                       |     |     |                                                                                                                                                                                                                                                                                                                                     |     |     |                                                                                                                                                                                                                                                                                                                                                                                                                                 |                      |       |        |                                  |     |     |                                                                                                                                                                                                                                                                                                                                     |     |     |                        |                      |       |                                                                                                                                                                                                                                                                                                                                                                                                                                                                                                                                                                  |               |     |    |                                  |     |     |                       |     |      |                        |     |     |  |
|                                  | OD                                                                                                                                                                                                                                                                                                                                                                                                                                                                   | OS                             |                                |                                |                                  |       |        |                       |     |     |                                                                                                                                                                                                                                                                                                                                     |     |     |                                                                                                                                                                                                                                                                                                                                                                                                                                 |                      |       |        |                                  |     |     |                                                                                                                                                                                                                                                                                                                                     |     |     |                        |                      |       |                                                                                                                                                                                                                                                                                                                                                                                                                                                                                                                                                                  |               |     |    |                                  |     |     |                       |     |      |                        |     |     |  |
| Grosor RNFL promedio             | 87 µm                                                                                                                                                                                                                                                                                                                                                                                                                                                                | 198 µm                         |                                |                                |                                  |       |        |                       |     |     |                                                                                                                                                                                                                                                                                                                                     |     |     |                                                                                                                                                                                                                                                                                                                                                                                                                                 |                      |       |        |                                  |     |     |                                                                                                                                                                                                                                                                                                                                     |     |     |                        |                      |       |                                                                                                                                                                                                                                                                                                                                                                                                                                                                                                                                                                  |               |     |    |                                  |     |     |                       |     |      |                        |     |     |  |
| Simetría RNFL                    | 29%                                                                                                                                                                                                                                                                                                                                                                                                                                                                  |                                |                                |                                |                                  |       |        |                       |     |     |                                                                                                                                                                                                                                                                                                                                     |     |     |                                                                                                                                                                                                                                                                                                                                                                                                                                 |                      |       |        |                                  |     |     |                                                                                                                                                                                                                                                                                                                                     |     |     |                        |                      |       |                                                                                                                                                                                                                                                                                                                                                                                                                                                                                                                                                                  |               |     |    |                                  |     |     |                       |     |      |                        |     |     |  |
| <b>Propranolol dosage</b>        | <i>None</i>                                                                                                                                                                                                                                                                                                                                                                                                                                                          | <i>120 mg/day (40 mg/ 8 h)</i> | <i>120 mg/day (40 mg/ 8 h)</i> | <i>120 mg/day (40 mg/ 8 h)</i> | -                                |       |        |                       |     |     |                                                                                                                                                                                                                                                                                                                                     |     |     |                                                                                                                                                                                                                                                                                                                                                                                                                                 |                      |       |        |                                  |     |     |                                                                                                                                                                                                                                                                                                                                     |     |     |                        |                      |       |                                                                                                                                                                                                                                                                                                                                                                                                                                                                                                                                                                  |               |     |    |                                  |     |     |                       |     |      |                        |     |     |  |
| <b>Comments</b>                  | This patient had a severe retinal disease with important visual impairment. She had to undergo retinal surgery, scheduled before the start of the trial. She was admitted to the trial in an attempt to avoid such surgery, but finally it was inevitable.                                                                                                                                                                                                           |                                |                                |                                |                                  |       |        |                       |     |     |                                                                                                                                                                                                                                                                                                                                     |     |     |                                                                                                                                                                                                                                                                                                                                                                                                                                 |                      |       |        |                                  |     |     |                                                                                                                                                                                                                                                                                                                                     |     |     |                        |                      |       |                                                                                                                                                                                                                                                                                                                                                                                                                                                                                                                                                                  |               |     |    |                                  |     |     |                       |     |      |                        |     |     |  |

**LEGEND**

UCVA - Uncorrected visual acuity  
IOP – Intraocular pressure  
FA – Fluorescein angiography  
OCT - Optical coherence tomography

| <b>PATIENT 7. Male, 22 yo</b>                  | <b>Baseline Visit</b>                                                                                                                                                                                                  | <b>2<sup>nd</sup> visit</b>                | <b>Last Clinical Trial Visit</b>           | <b>October 2016 - continued taking propranolol – off-label</b> |
|------------------------------------------------|------------------------------------------------------------------------------------------------------------------------------------------------------------------------------------------------------------------------|--------------------------------------------|--------------------------------------------|----------------------------------------------------------------|
| <b>UCVA</b><br>Right eye<br>Left eye           | 1,25<br>1,25                                                                                                                                                                                                           | 1,25<br>1,25                               | 1,25<br>1,25                               | 1,25<br>1,25                                                   |
| <b>Slit lamp examination</b>                   | Normal                                                                                                                                                                                                                 | Normal                                     | Normal                                     | Normal                                                         |
| <b>IOP (mmHg)</b><br>Right eye<br>Left eye     | 13<br>14                                                                                                                                                                                                               | 16<br>16                                   | 12<br>12                                   | 12<br>13                                                       |
| <b>Funduscopy</b><br>Right eye<br><br>Left eye | <i>Large hemangioblastoma located superior with afferent and efferent vessels. Another smaller one located inferior</i><br><br><i>Large hemangioblastoma nasal inferior and another smaller temporal one. inferior</i> | <i>No changes</i><br><br><i>No changes</i> | <i>No changes</i><br><br><i>No changes</i> | <i>No changes</i><br><br><i>No changes</i>                     |
| <b>Retinography/FA</b><br>Right eye            |                                                                                                                                                                                                                        |                                            |                                            |                                                                |

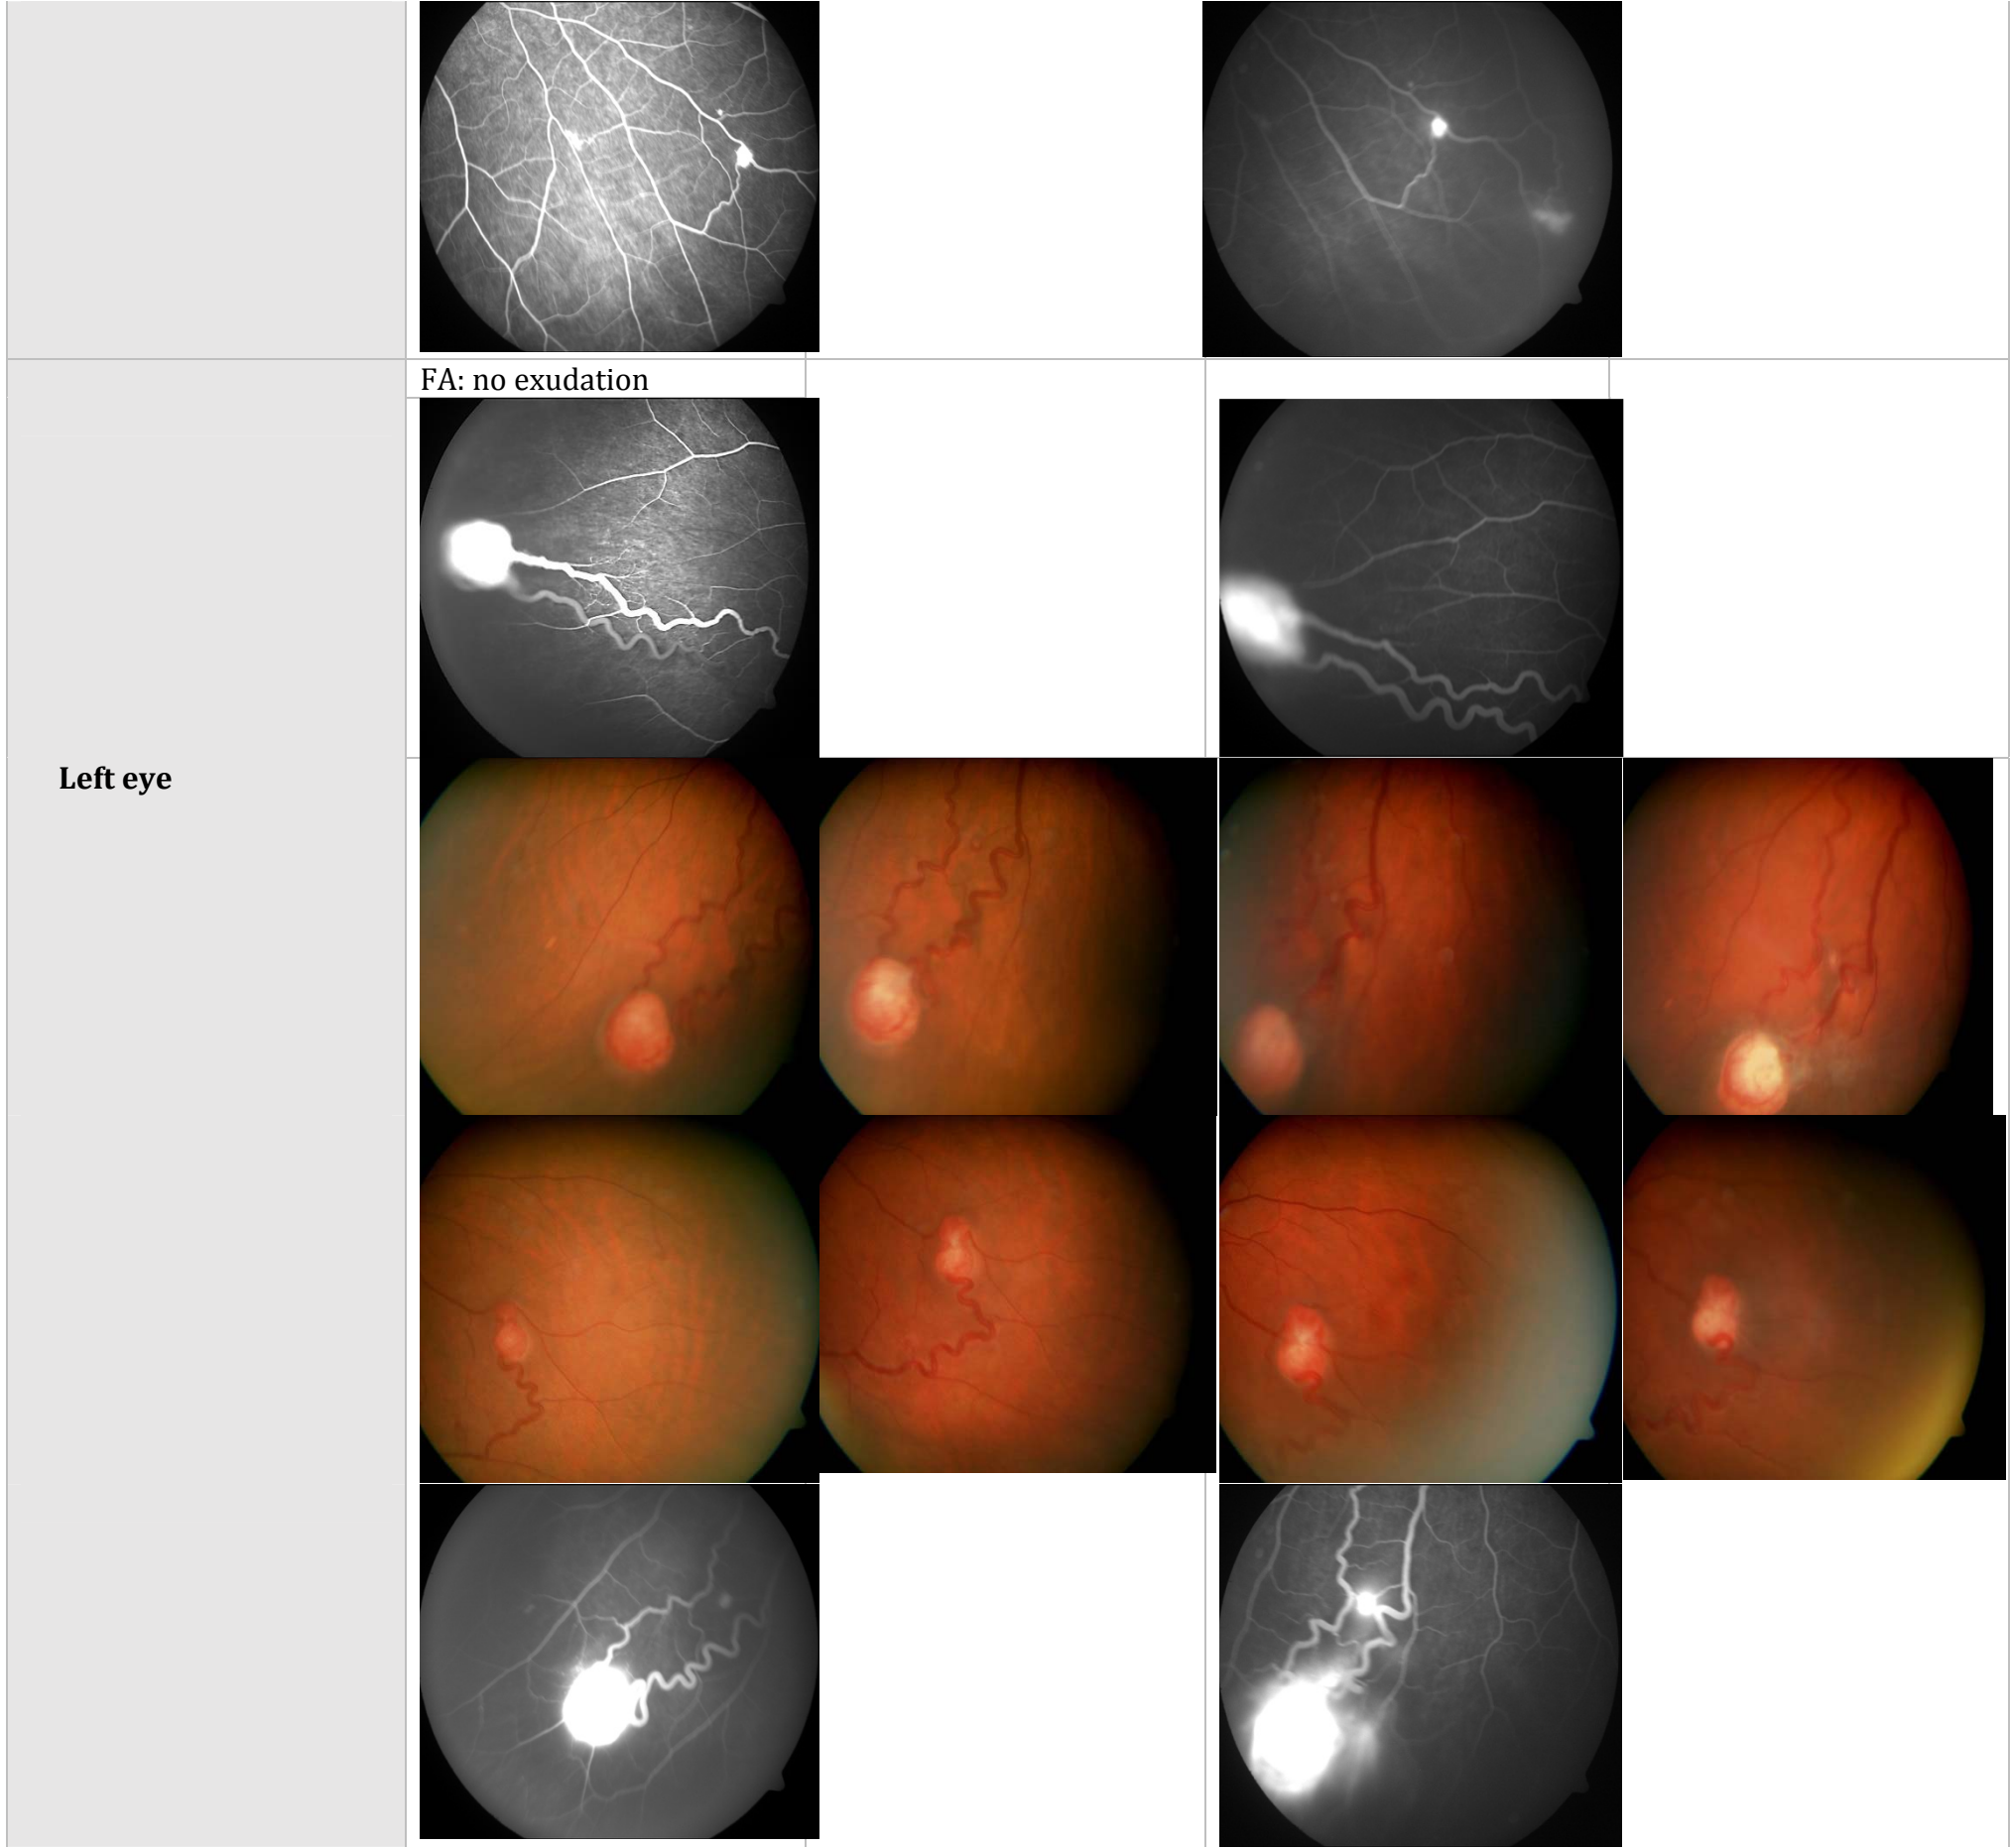

|                                    | 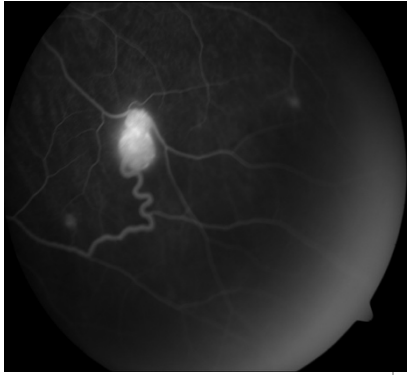                                                                                                                                                                                                                                                                                                                                                                                       |                         |  |                         |                                  |       |        |                                    |      |      |                        |            |            |            |            |            |
|------------------------------------|--------------------------------------------------------------------------------------------------------------------------------------------------------------------------------------------------------------------------------------------------------------------------------------------------------------------------------------------------------------------------------------------------------------------------------------------------------------------------|-------------------------|-------------------------------------------------------------------------------------|-------------------------|----------------------------------|-------|--------|------------------------------------|------|------|------------------------|------------|------------|------------|------------|------------|
|                                    | FA: no exudation.                                                                                                                                                                                                                                                                                                                                                                                                                                                        |                         |                                                                                     |                         |                                  |       |        |                                    |      |      |                        |            |            |            |            |            |
| <b>OCT</b><br><b>Macular</b>       |  <table border="1" data-bbox="839 699 1181 798"> <thead> <tr> <th>ILM - RPE</th> <th>OD</th> <th>OS</th> </tr> </thead> <tbody> <tr> <td>Grosor del subcampo central (µm)</td> <td>271</td> <td>271</td> </tr> <tr> <td>Cubo de volumen (mm<sup>3</sup>)</td> <td>10.7</td> <td>10.7</td> </tr> <tr> <td>Cubo grosor prom. (µm)</td> <td>296</td> <td>296</td> </tr> </tbody> </table> | ILM - RPE               | OD                                                                                  | OS                      | Grosor del subcampo central (µm) | 271   | 271    | Cubo de volumen (mm <sup>3</sup> ) | 10.7 | 10.7 | Cubo grosor prom. (µm) | 296        | 296        | No changes | No changes | No changes |
| ILM - RPE                          | OD                                                                                                                                                                                                                                                                                                                                                                                                                                                                       | OS                      |                                                                                     |                         |                                  |       |        |                                    |      |      |                        |            |            |            |            |            |
| Grosor del subcampo central (µm)   | 271                                                                                                                                                                                                                                                                                                                                                                                                                                                                      | 271                     |                                                                                     |                         |                                  |       |        |                                    |      |      |                        |            |            |            |            |            |
| Cubo de volumen (mm <sup>3</sup> ) | 10.7                                                                                                                                                                                                                                                                                                                                                                                                                                                                     | 10.7                    |                                                                                     |                         |                                  |       |        |                                    |      |      |                        |            |            |            |            |            |
| Cubo grosor prom. (µm)             | 296                                                                                                                                                                                                                                                                                                                                                                                                                                                                      | 296                     |                                                                                     |                         |                                  |       |        |                                    |      |      |                        |            |            |            |            |            |
| <b>Optic nerve</b>                 |  <table border="1" data-bbox="839 961 1181 1029"> <thead> <tr> <th></th> <th>OD</th> <th>OS</th> </tr> </thead> <tbody> <tr> <td>Grosor RNFL promedio</td> <td>99 µm</td> <td>102 µm</td> </tr> <tr> <td>Simetría RNFL</td> <td colspan="2">83%</td> </tr> </tbody> </table>                                                                                                           |                         | OD                                                                                  | OS                      | Grosor RNFL promedio             | 99 µm | 102 µm | Simetría RNFL                      | 83%  |      | No changes             | No changes | No changes |            |            |            |
|                                    | OD                                                                                                                                                                                                                                                                                                                                                                                                                                                                       | OS                      |                                                                                     |                         |                                  |       |        |                                    |      |      |                        |            |            |            |            |            |
| Grosor RNFL promedio               | 99 µm                                                                                                                                                                                                                                                                                                                                                                                                                                                                    | 102 µm                  |                                                                                     |                         |                                  |       |        |                                    |      |      |                        |            |            |            |            |            |
| Simetría RNFL                      | 83%                                                                                                                                                                                                                                                                                                                                                                                                                                                                      |                         |                                                                                     |                         |                                  |       |        |                                    |      |      |                        |            |            |            |            |            |
| <b>Propranolol dosage</b>          | None                                                                                                                                                                                                                                                                                                                                                                                                                                                                     | 120 mg/day (40 mg/ 8 h) | 120 mg/day (40 mg/ 8 h)                                                             | 120 mg/day (40 mg/ 8 h) |                                  |       |        |                                    |      |      |                        |            |            |            |            |            |
| <b>Comments</b>                    | This patient had rejected standard treatments some time before his inclusion in the clinical trial. At present, <b>he continues taking propranolol off-label.</b>                                                                                                                                                                                                                                                                                                        |                         |                                                                                     |                         |                                  |       |        |                                    |      |      |                        |            |            |            |            |            |

**LEGEND**

- UCVA - Uncorrected visual acuity
- IOP - Intraocular pressure
- FA - Fluorescein angiography
- OCT - Optical coherence tomography
