# Supplementary material for: Evaluation of the safety and effectiveness of oral propranolol in patients with von Hippel-Lindau disease and retinal hemangioblastomas: phase III clinical trial
Source: PubMed Central journal article supplement — BMJ Open Ophthalmol. 2019 May 28;4(1):e000203. doi: 10.1136/bmjophth-2018-000203 (PMC6557078; doi:10.1136/bmjophth-2018-000203), 2019-05-28
Supplement: bmjophth-2018-000203supp002.pdf [file bmjophth-2018-000203supp002.pdf]

**Supplementary table 2. Central nervous system findings before and after the end of the clinical trial\***

| Patient | Age and gender | Gene <i>VHL</i> <sup>12</sup> |                                            | Pre-existent HB (MRI) |                         | Changes at the end (MRI)                 |                                              |
|---------|----------------|-------------------------------|--------------------------------------------|-----------------------|-------------------------|------------------------------------------|----------------------------------------------|
|         |                | Locus                         | Mutation                                   | Brain                 | Spinal Cord             | Brain                                    | Spinal Cord                                  |
| 1       | 36 M           | Intron 2                      | Splice g.8665, A > G;<br>c.DNA 463,+2A > C | 2RCH-1LCH-1V          | No                      | 1LCH - growth in nodule, cyst and oedema | No                                           |
| 2       | 33 F           | Intron 2                      | Splice g.8665, A > G;<br>c.DNA 463,+2A > C | 1MO                   | No                      | Growth in nodule                         | No                                           |
| 3       | 50 F           | Exon 3                        | c.501 A > T                                | 2LCH                  | No                      | No                                       | No                                           |
| 4       | 20 M           | Exon 3                        | c.501 A > T                                | 1LCH- 1MO             | T7-T10-T12-L1           | MO- growth in nodule and cyst            | No                                           |
| 5       | 15 M           | Ex1-2-3                       | del complete <i>VHL</i>                    | 1MO                   | 1C4, 2C5, 2C6, 1D5, 1L1 | No                                       | Growth in nodule and oedema of 2 cervical HB |
| 6       | 38 F           | Exon 1                        | del exon 1                                 | No                    | No                      | <i>Withdrawn</i>                         | <i>Withdrawn</i>                             |
| 7       | 22 M           | Exon 3                        | c.486, C > G                               | No                    | 1T2-1T3                 | No                                       | No                                           |

The number before the acronym represents the number of tumours. RCH - Right cerebellar hemisphere; LCH - Left cerebellar hemisphere; MO - medulla oblongata; V - Vermis; HB - Hemangioblastoma; CT - Clinical trial.

*\*All patients were scheduled for an MRI study before the start of the clinical trial (performed between 1-3 months before) and a new one in the last month of the CT.*
